# Supplementary material for: Evidence for a Novel Mechanism of Influenza Virus-Induced Type I Interferon Expression by a Defective RNA-Encoded Protein
Source: PubMed Central journal article supplement (PMC4449196; doi:10.1371/journal.ppat.1004924), 2015-05-29
Supplement: ppat.1004924.s001.pdf [file ppat.1004924.s001.pdf]

**S1 Table. Multiple sequence alignment of PB2 mRNA fragments from known human H5N1 influenza A viruses.**

All sequences were obtained from NCBI's Influenza Virus Resource (<http://www.ncbi.nlm.nih.gov/genomes/FLU/FLU.html>).

|          | 222        | 235                 | 240             | 255   | 1945              | 1956             | 1961 | 1970 |
|----------|------------|---------------------|-----------------|-------|-------------------|------------------|------|------|
|          | *          | *                   | *               | *     | *                 | *                | *    | *    |
| CY111595 | 5'-. . . . | GATGATTCCTGAAAGGAAT | GAACAAGGGCAGACG | ----- | GTGAGAGGCTCAGGAAT | GAGAATACT. . . . | 3'   |      |
| HM172413 | 5'-. . . . | GATGATTCCTGAAAGGAAT | GAACAAGGGCAGACG | ----- | GTGAGAGGCTCAGGAAT | GAGAATACT. . . . | 3'   |      |
| EU263988 | 5'-. . . . | GATGATTCCTGAAAGGAAT | GAACAAGGGCAGACG | ----- | GTGAGAGGCTCAGGAAT | GAGAATACT. . . . | 3'   |      |
| EU146846 | 5'-. . . . | GATGATTCCTGAAAGGAAT | GAACAAGGGCAGACA | ----- | GTTAGAGGCTCAGGAAT | GAGAATACT. . . . | 3'   |      |
| HM114566 | 5'-. . . . | AATGATCCCTGAAAGGAAT | GAACAAGGGCAGACG | ----- | GTGAGAGGCTCAGGAAT | GAGGATACT. . . . | 3'   |      |
| HM114542 | 5'-. . . . | AATGATCCCTGAAAGGAAT | GAACAAGGGCAGACG | ----- | GTGAGAGGCTCAGGAAT | GAGGATACT. . . . | 3'   |      |
| HM114550 | 5'-. . . . | AATGATCCCTGAAAGGAAT | GAACAAGGGCAGACG | ----- | GTGAGAGGCTCAGGAAT | GAGGATACT. . . . | 3'   |      |
| HM114558 | 5'-. . . . | AATGATCCCTGAAAGGAAT | GAACAAGGGCAGACG | ----- | GTGAGAGGCTCAGGAAT | GAGGATACT. . . . | 3'   |      |
| GQ232441 | 5'-. . . . | AATGATCCCTGAAAGGAAT | GAACAAGGGCAGACG | ----- | GTGAGAGGCTCAGGAAT | GAGGATACT. . . . | 3'   |      |
| HM114582 | 5'-. . . . | AATGATCCCTGAAAGGAAT | GAACAAGGGCAGACG | ----- | GTGAGAGGCTCAGGAAT | GAGGATACT. . . . | 3'   |      |
| HM114614 | 5'-. . . . | GATGATTCCTGAAAGGAAT | GAACAAGGGCAGACG | ----- | GTGAGAGGCTCAGGAAT | GAGAATACT. . . . | 3'   |      |
| HM114606 | 5'-. . . . | AATGATCCCTGAAAGGAAT | GAACAAGGGCAGACG | ----- | GTGAGAGGCTCAGGAAT | GAGGATACT. . . . | 3'   |      |
| HM114598 | 5'-. . . . | AATGATCCCTGAAAGGAAT | GAGCAAGGGCAGACG | ----- | GTGAGAGGCTCAGGAAT | GAGGATACT. . . . | 3'   |      |
| CY088766 | 5'-. . . . | GATGATTCCTGAAAGGAAT | GAACAAGGGCAGACA | ----- | GTGAGAGGCTCAGGAAT | GAGAATACT. . . . | 3'   |      |
| EU434701 | 5'-. . . . | GATGATCCCTGAAAGGAAT | GAACAAGGGCAGACA | ----- | GTGAGAGGCTCAGGAAT | GAGAATACT. . . . | 3'   |      |
| EU434693 | 5'-. . . . | GATGATCCCTGAAAGGAAT | GAACAAGGGCAGACA | ----- | GTGAGAGGCTCAGGAAT | GAGAATACT. . . . | 3'   |      |
| AF115291 | 5'-. . . . | GATGATCCCTGAAAGGAAT | GAGCAAGGTCAAAC  | ----- | GTGAGGGGATCAGGAAT | GAGAATACT. . . . | 3'   |      |
| AF084261 | 5'-. . . . | GATGATCCCTGAAAGGAAT | GAGCAAGGTCAAAC  | ----- | GTGAGGGGATCAGGAAT | GAGAATACT. . . . | 3'   |      |
| AF084262 | 5'-. . . . | GATGATCCCTGAAAGGAAT | GAGCAAGGTCAAAC  | ----- | GTGAGGGGATCAGGAAT | GAGAATACT. . . . | 3'   |      |
| AF084263 | 5'-. . . . | GATGATCCCTGAAAGGAAT | GAGCAAGGTCAAAC  | ----- | GTGAGGGGATCAGGAAT | GAGAATACT. . . . | 3'   |      |
| AF115290 | 5'-. . . . | GATGATCCCTGAAAGGAAT | GATCAAGGTCAAAC  | ----- | GTGAGGGGATCAGGAAT | GAGAATACT. . . . | 3'   |      |
| CY098659 | 5'-. . . . | GATGATTCCTGAAAGGAAT | GAACAAGGGCAGACG | ----- | GTGAGAGGCTCAGGAAT | GAGAATACT. . . . | 3'   |      |
| CY098576 | 5'-. . . . | GATGATTCCTGAAAGGAAT | GAACAAGGGCAGACG | ----- | GTGAGAGGCTCAGGAAT | GAGAATACT. . . . | 3'   |      |
| CY098582 | 5'-. . . . | GATGATTCCTGAAAGGAAT | GAACAAGGGCAGACG | ----- | GTGAGAGGCTCAGGAAT | GAGAATACT. . . . | 3'   |      |
| CY098571 | 5'-. . . . | GATGATTCCTGAAAGGAAT | GAACAAGGGCAGACG | ----- | GTGAGAGGCTCAGGAAT | GAGAATACT. . . . | 3'   |      |
| CY098613 | 5'-. . . . | GATGATTCCTGAAAGGAAT | GAACAAGGGCAGACG | ----- | GTGAGAGGCTCAGGAAT | GAGAATACT. . . . | 3'   |      |
| CY098607 | 5'-. . . . | GATGATTCCTGAAAGGAAT | GAACAAGGGCAGACG | ----- | GTGAGAGGCTCAGGAAT | GAGAATACT. . . . | 3'   |      |
| CY098638 | 5'-. . . . | GATGATTCCTGAAAGGAAT | GAACAAGGGCAGACG | ----- | GTGAGAGGCTCAGGAAT | GAGAATACT. . . . | 3'   |      |
| CY098619 | 5'-. . . . | GATGATTCCTGAAAGGAAT | GAACAAGGGCAGACG | ----- | GTGAGAGGCTCAGGAAT | GAGAATACT. . . . | 3'   |      |
| CY098645 | 5'-. . . . | GATGATTCCTGAAAGGAAT | GAACAAGGGCAGACG | ----- | GTGAGAGGCTCAGGAAT | GAGAATACT. . . . | 3'   |      |
| CY098652 | 5'-. . . . | GATGATTCCTGAAAGGAAT | GAACAAGGGCAGACG | ----- | GTGAGAGGCTCAGGAAT | GAGAATACT. . . . | 3'   |      |
| CY098678 | 5'-. . . . | GATGGTTCCTGAAAGGAAT | GAACAAGGGCAGACG | ----- | GTGAGAGGCTCAGGAAT | GAGAATACT. . . . | 3'   |      |
| CY098692 | 5'-. . . . | GATGATCCCTGAAAGGAAT | GAACAAGGGCAGACG | ----- | GTGAGAGGCTCAGGAAT | GAGGATACT. . . . | 3'   |      |
| CY098672 | 5'-. . . . | GATGATTCCTGAAAGGAAT | GAACAAGGGCAGACG | ----- | GTGAGAGGCTCAGGAAT | GAGAATACT. . . . | 3'   |      |
| CY098706 | 5'-. . . . | GATGATTCCTGAAAGGAAT | GAACAAGGGCAGACG | ----- | GTGAGAGGCTCAGGAT  | GAGAATACT. . . . | 3'   |      |

|          | 222          | 235                 | 240             | 255   | 1945               | 1956               | 1961 | 1970 |
|----------|--------------|---------------------|-----------------|-------|--------------------|--------------------|------|------|
|          | *            | *                   | *               | *     | *                  | *                  | *    | *    |
| CY098734 | 5'-. . . . . | GATGATTCCTGAAAGGAAT | GAACAGGGGCAGACA | ----- | GTGAGGGGCTCAGGAAT  | GAGAATACT. . . -3' |      |      |
| CY098748 | 5'-. . . . . | GATGATTCCTGAAAGGAAT | GAACAGGGGCAGACA | ----- | GTGAGGGGCTCAGGAAT  | GAGAATACT. . . -3' |      |      |
| CY098720 | 5'-. . . . . | GATGATTCCTGAAAGGAAT | GAACAAGGGCAGACA | ----- | GTGAGGGGCTCAGGAAT  | GAGAATACT. . . -3' |      |      |
| CY098727 | 5'-. . . . . | TATGATTCCTGAAAGGAAT | GAACAAGGGCAGACG | ----- | GTGAGAGGCTCAGGAAT  | GAGAATACT. . . -3' |      |      |
| CY098755 | 5'-. . . . . | TATGATTCCTGAAAGGAAT | GAACAAGGGCAGACA | ----- | GTGAGGGGCTCAGGAAT  | GAGAATACT. . . -3' |      |      |
| CY098665 | 5'-. . . . . | GATGATCCCTGAAAGGAAT | GAACAAGGGCAGACA | ----- | GTGAGAGGTTTCAGGAAT | GAGAATACT. . . -3' |      |      |
| CY098625 | 5'-. . . . . | GATGATCCCTGAAAGGAAT | GAACAAGGGCAGACA | ----- | GTGAGAGGTTTCAGGAAT | GAGAATACT. . . -3' |      |      |
| CY098631 | 5'-. . . . . | GATGATCCCTGAAAGGAAT | GAACAAGGGCAGACA | ----- | GTGAGAGGTTTCAGGAAT | GAGAATACT. . . -3' |      |      |
| CY098594 | 5'-. . . . . | GATGATCCCTGAAAGGAAT | GAACAAGGGCAGACA | ----- | GTGAGAGGTTTCAGGAAT | GAGAATACT. . . -3' |      |      |
| CY098588 | 5'-. . . . . | GATGATCCCTGAAAGGAAT | GAACAAGGGCAGACA | ----- | GTGAGAGGTTTCAGGAAT | GAGAATACT. . . -3' |      |      |
| CY098685 | 5'-. . . . . | GATGATCCCTGAAAGGAAT | GAACAAGGGCAGACA | ----- | GTGAGAGGTTTCAGGAAT | GAGAATACT. . . -3' |      |      |
| CY098713 | 5'-. . . . . | GATGATCCCTGAAAGGAAT | GAACAAGGGCAGACA | ----- | GTGAGAGGTTTCAGGAAT | GAGAATACT. . . -3' |      |      |
| CY098699 | 5'-. . . . . | GATGATCCCTGAAAGGAAT | GAACAAGGGCAGACA | ----- | GTGAGAGGTTTCAGGAAT | GAGAATACT. . . -3' |      |      |
| JN588925 | 5'-. . . . . | GATGATCCCTGAAAGGAAT | GAACAAGGGCAGACG | ----- | GTGAGAGGCTCAGGAAT  | GAGAATACT. . . -3' |      |      |
| JN588929 | 5'-. . . . . | GATGATCCCTGAAAGGAAT | GAACAAGGGCAGACG | ----- | GTGAGAGGCTCAGGAAT  | GAGAATACT. . . -3' |      |      |
| AB598126 | 5'-. . . . . | GATGATTCCTGAAAGGAAT | GAACAAGGGCAGACG | ----- | GTGAGAGGCTCAGGAAT  | GAGAATACT. . . -3' |      |      |
| JQ714243 | 5'-. . . . . | GATGATCCCTGAAAGGAAT | GAACAAGGGCAGACG | ----- | GTGAGAGGCTCAGGAAT  | GAGAATACT. . . -3' |      |      |
| HQ664943 | 5'-. . . . . | GATGATTCCTGAAAGGAAT | GAACAAGGGCAGACG | ----- | GTGAGAGGCTCAGGAAT  | GAGAATACT. . . -3' |      |      |
| EU146634 | 5'-. . . . . | AATGATTCCTGAAAGGAAT | GAACAAGGGCAGACA | ----- | GTGAGAGGCTCAGGAAT  | GAGAATACT. . . -3' |      |      |
| AY651721 | 5'-. . . . . | GATGATTCCTGAAAGGAAT | GAACAAGGGCAGACG | ----- | GTGAGAGGCTCAGGAAT  | GAGAATACT. . . -3' |      |      |
| JN588926 | 5'-. . . . . | GATGATCCCTGAAAGGAAT | GAACAAGGGCAGACG | ----- | GTGAGAGGCTCAGGAAT  | GAGAATACT. . . -3' |      |      |
| EF456776 | 5'-. . . . . | GATGATTCCTGAAAGGAAT | GAACAAGGGCAGACG | ----- | GTGAGAGGATCAGGAAT  | GAGAATACT. . . -3' |      |      |
| EF467807 | 5'-. . . . . | GATGATTCCTGAAAGGAAT | GAACAAGGGCAGACG | ----- | GTGAGAGGCTCAGGAAT  | GAGAATACT. . . -3' |      |      |
| EF467805 | 5'-. . . . . | GATGATTCCTGAAAGGAAT | GAACAAGGGCAGACG | ----- | GTGAGAGGCTCAGGAAT  | GAGAATACT. . . -3' |      |      |
| EF467806 | 5'-. . . . . | GATGATTCCTGAAAGGAAT | GAACAAGGGCAGACG | ----- | GTGAGAGGCTCAGGAAT  | GAGAATACT. . . -3' |      |      |
| AY576381 | 5'-. . . . . | GATGATTCCTGAAAGGAAT | GAACAAGGGCAGACG | ----- | GTGAGAGGCTCAGGAAT  | GAGAATACT. . . -3' |      |      |
| GU052096 | 5'-. . . . . | GATGATTCCTGAAAGGAAT | GAACAAGGGCAGACG | ----- | GTGAGAGGCTCAGGAAT  | GAGAATACT. . . -3' |      |      |
| GU052104 | 5'-. . . . . | GATGATCCCTGAAAGGAAT | GAGCAAGGTCAAAC  | ----- | GTGAGGGGATCAGGAAT  | GAGAATACT. . . -3' |      |      |
| GU052149 | 5'-. . . . . | GATGATCCCTGAAAGGAAT | GAGCAAGGTCAAAC  | ----- | GTGAGGGGATCAGGAAT  | GAGAATACT. . . -3' |      |      |
| DQ360837 | 5'-. . . . . | GATGATTCCTGAAAGGAAT | GAACAAGGGCAGACG | ----- | GTGAGAGGATCAGGAAT  | GAGAATACT. . . -3' |      |      |
| JN588924 | 5'-. . . . . | GATGATCCCTGAAAGGAAT | GAACAAGGGCAGACG | ----- | GTGAGAGGCTCAGGAAT  | GAGAATACT. . . -3' |      |      |
| AY576380 | 5'-. . . . . | GATGATTCCTGAAAGGAAT | GAACAAGGGCAGACG | ----- | GTGAGAGGCTCAGGAAT  | GAGAATACT. . . -3' |      |      |
| JN588923 | 5'-. . . . . | GATGATCCCTGAAAGGAAT | GAACAAGGGCAGACG | ----- | GTGAGAGGCTCAGGAAT  | GAGAATACT. . . -3' |      |      |
| EU146687 | 5'-. . . . . | GATGATTCCTGAAAGGAAT | GAACAAGGGCAGACG | ----- | GTGAGAGGCTCAGGAAT  | GAGAATACT. . . -3' |      |      |
| JN588928 | 5'-. . . . . | GATGATCCCTGAAAGGAAT | GAACAAGGGCAGACG | ----- | GTGAGAGGCTCAGGAAT  | GAGAATACT. . . -3' |      |      |
| CY098741 | 5'-. . . . . | TATGATTCCTGAAAGGAAT | GAACAAGGGCAGACG | ----- | GTGAGAGGCTCAGGAAT  | GAGAATACT. . . -3' |      |      |
| JN588927 | 5'-. . . . . | GATGATCCCTGAAAGGAAT | GAACAAGGGCAGACG | ----- | GTGAGAGGCTCAGGAAT  | GAGAATACT. . . -3' |      |      |
| CY116643 | 5'-. . . . . | GATGATTCCTGAAAGGAAT | GAGCAAGGGCAGACG | ----- | GTGAGAGGCTCAGGAAT  | GAGAATACT. . . -3' |      |      |
| AB212050 | 5'-. . . . . | GATGATTCCTGAAAGGAAT | GAACAAGGGCAGACG | ----- | GTGAGAGGCTCAGGAAT  | GAGAATACT. . . -3' |      |      |

|          | 222        | 235                 | 240             | 255   | 1945              | 1956               | 1961 | 1970 |
|----------|------------|---------------------|-----------------|-------|-------------------|--------------------|------|------|
|          | *          | *                   | *               | *     | *                 | *                  | *    | *    |
| AB212051 | 5'-. . . . | GATGATTCCTGAAAGGAAT | GAACAAGGGCAGACG | ----- | GTGAGAGGCTCAGGAAT | GAGAATACT. . . -3' |      |      |
| AY626149 | 5'-. . . . | GATGATTCCTGAAAGGAAT | GAACAAGGGCAGACG | ----- | GTGAGAGGCTCAGGAAT | GAGAATACT. . . -3' |      |      |
| AY627898 | 5'-. . . . | GATGATTCCTGAAAGGAAT | GAACAAGGGCAGACG | ----- | GTGAGAGGCTCAGGAAT | GAGAATACT. . . -3' |      |      |
| EF587274 | 5'-. . . . | GATGGTTCCTGAAAGGAAT | GAACAAGGGCAGACG | ----- | GTGAGAGGCTCAGGAAT | GAGAATACT. . . -3' |      |      |
| GQ466181 | 5'-. . . . | GATGATTCCTGAAAGGAAT | GAACAAGGGCAGACG | ----- | GTGAGAGGCTCAGGAAT | GAGAATACT. . . -3' |      |      |
| AY627892 | 5'-. . . . | GATGATTCCTGAAAGGAAT | GAACAAGGGCAGACG | ----- | GTGAGAGGCTCAGGAAT | GAGAATACT. . . -3' |      |      |
| HM006756 | 5'-. . . . | GATGATTCCTGAAAGGAAT | GAACAAGGGCAGACG | ----- | GTGAGAGGCTCAGGAAT | GAGAATACT. . . -3' |      |      |
| HQ200462 | 5'-. . . . | GATGATTCCTGAAAGGAAT | GAACAAGGGCAGACA | ----- | GTGAGAGGCTCAGGAAT | GAGAATACT. . . -3' |      |      |
| HQ200422 | 5'-. . . . | GATGATTCCTGAAAGGAAT | GAACAAGGGCAGACG | ----- | GTGAGAGGCTCAGGAAT | GAGAATACT. . . -3' |      |      |
| HM172451 | 5'-. . . . | GATGATTCCTGAAAGGAAT | GAACAAGGGCAGACG | ----- | GTGAGAGGCTCAGGAAT | GAGAATACT. . . -3' |      |      |
| CY098600 | 5'-. . . . | GATGATTCCTGAAAGGAAT | GAACAAGGGCAGACG | ----- | GTGAGAGGCTCAGGAAT | GAGAATACT. . . -3' |      |      |
| EF541126 | 5'-. . . . | GATGATCCCTGAAAGGAAT | GAACAAGGGCAGACG | ----- | GTGAGAGGCTCAGGAAT | GAGAATACT. . . -3' |      |      |
| AB462292 | 5'-. . . . | GATGATCCCTGAAAGGAAT | GAACAAGGGCAGACG | ----- | GTGAGAGGCTCAGGAAT | GAGAATACT. . . -3' |      |      |
| DQ835310 | 5'-. . . . | GATGATCCCTGAAAGGAAT | GAACAAGGGCAGACG | ----- | GTGAGAGGCTCAGGAAT | GAGAATACT. . . -3' |      |      |
| AF036363 | 5'-. . . . | GATGATCCCTGAAAGGAAT | GAGCAAGGTCAAACT | ----- | GTGAGAGGCTCAGGAAT | GAGAATACT. . . -3' |      |      |
| AF258840 | 5'-. . . . | GATGATCCCTGAAAGGAAT | GAGCAAGGTCAAACT | ----- | GTGAGAGGCTCAGGAAT | GAGAATACT. . . -3' |      |      |
| AF258846 | 5'-. . . . | GATGATCCCTGAAAGGAAT | GAGCAAGGTCAAACT | ----- | GTGAGAGGCTCAGGAAT | GAGAATACT. . . -3' |      |      |
| AJ404632 | 5'-. . . . | GATGATCCCTGAAAGGAAT | GAGCAAGGTCAAACT | ----- | GTGAGAGGCTCAGGAAT | GAGAATACT. . . -3' |      |      |
| AF258839 | 5'-. . . . | GATGATCCCTGAAAGGAAT | GAGCAAGGTCAAACT | ----- | GTGAGAGGCTCAGGAAT | GAGAATACT. . . -3' |      |      |
| AF258838 | 5'-. . . . | GATGATCCCTGAAAGGAAT | GAGCAAGGTCAAACT | ----- | GTGAGAGGCTCAGGAAT | GAGAATACT. . . -3' |      |      |
| AF258845 | 5'-. . . . | GATGATCCCTGAAAGGAAT | GAGCAAGGTCAAACT | ----- | GTGAGAGGCTCAGGAAT | GAGAATACT. . . -3' |      |      |
| AF258844 | 5'-. . . . | GATGATCCCTGAAAGGAAT | GAGCAAGGTCAAACT | ----- | GTGAGAGGCTCAGGAAT | GAGAATACT. . . -3' |      |      |
| AF258837 | 5'-. . . . | GATGATCCCTGAAAGGAAT | GATCAAGGTCAAACT | ----- | GTGAGAGGCTCAGGAAT | GAGAATACT. . . -3' |      |      |
| AF258843 | 5'-. . . . | GATGATCCCTGAAAGGAAT | GAGCAAGGTCAAACT | ----- | GTGAGAGGCTCAGGAAT | GAGAATACT. . . -3' |      |      |
| CY017675 | 5'-. . . . | GATGATTCCTGAAAGGAAT | GAACAAGGGCAGACG | ----- | GTGAGAGGCTCAGGAAT | GAGAATACT. . . -3' |      |      |
| CY014167 | 5'-. . . . | GATGATTCCTGAAAGGAAT | GAGCAAGGGCAGACG | ----- | GTGAGAGGCTCAGGAAT | GAGAATACT. . . -3' |      |      |
| CY017659 | 5'-. . . . | GATGATTCCTGAAAGGAAT | GAACAAGGGCAGACG | ----- | GTGAGAGGCTCAGGAAT | GAGAATACT. . . -3' |      |      |
| CY017651 | 5'-. . . . | GATGATTCCTGAAAGGAAT | GAACAAGGGCAGACG | ----- | GTGAGAGGCTCAGGAAT | GAGAATACT. . . -3' |      |      |
| CY017667 | 5'-. . . . | GATGATTCCTGAAAGGAAT | GAACAAGGGCAGACG | ----- | GTGAGAGGCTCAGGAAT | GAGAATACT. . . -3' |      |      |
| CY017685 | 5'-. . . . | GATGATTCCTGAAAGGAAT | GAACAAGGGCAGACG | ----- | GTGAGAGGCTCAGGAAT | GAGAATACT. . . -3' |      |      |
| CY017635 | 5'-. . . . | GATGATTCCTGAAAGGAAT | GAACAAGGGCAGACG | ----- | GTGAGAGGCTCAGGAAT | GAGAATACT. . . -3' |      |      |
| CY017643 | 5'-. . . . | GATGATTCCTGAAAGGAAT | GAACAAGGGCAGACG | ----- | GTGAGAGGCTCAGGAAT | GAGAATACT. . . -3' |      |      |
| CY014367 | 5'-. . . . | GATGATTCCTGAAAGGAAT | GAACAAGGGCAGACG | ----- | GTGAGAGGCTCAGGAAT | GAGAATACT. . . -3' |      |      |
| CY014325 | 5'-. . . . | GATGATTCCTGAAAGGAAT | GAACAAGGGCAGACG | ----- | GTGAGAGGCTCAGGAAT | GAGAATACT. . . -3' |      |      |
| CY014348 | 5'-. . . . | GATGATTCCTGAAAGGAAT | GAACAAGGGCAGACG | ----- | GTGAGAGGCTCAGGAAT | GAGAATACT. . . -3' |      |      |
| DQ535731 | 5'-. . . . | GATGATTCCTGAAAGGAAT | GAACAAGGGCAGACG | ----- | GTGAGAGGCTCAGGAAT | GAGAATACT. . . -3' |      |      |
| CY014322 | 5'-. . . . | GATGATTCCTGAAAGGAAT | GAACAAGGGCAGACG | ----- | GTGAGAGGCTCAGGAAT | GAGAATACT. . . -3' |      |      |
| CY014352 | 5'-. . . . | GATGATTCCTGAAAGGAAT | GAACAAGGGCAGACG | ----- | GTGAGAGGCTCAGGAAT | GAGAATACT. . . -3' |      |      |
| CY014346 | 5'-. . . . | GATGATTCCTGAAAGGAAT | GAACAAGGGCAGACG | ----- | GTGAGAGGCTCAGGAAT | GAGAATACT. . . -3' |      |      |



|          | 222          | 235                 | 240             | 255   | 1945        | 1956            | 1961      | 1970 |
|----------|--------------|---------------------|-----------------|-------|-------------|-----------------|-----------|------|
|          | *            | *                   | *               | *     | *           | *               | *         | *    |
| CY014512 | 5'-. . . . . | GATGATTCCTGAAAGGAAT | GAACAAGGGCAGACG | ----- | GTGAGAGGCTC | TGGAATGAGAATACT | . . . . . | -3'  |
| AY818126 | 5'-. . . . . | GATGATTCCTGAAAGGAAT | GAACAAGGGCAGACG | ----- | GTGAGAGGCTC | AGGAATGAGAATACT | . . . . . | -3'  |
| EU146655 | 5'-. . . . . | AATGATTCCTGAAAGGAAT | GAACAAGGGCAGACA | ----- | GTGAGAGGCTC | TGGAATGAGAATACT | . . . . . | -3'  |
| CY014520 | 5'-. . . . . | GATGATTCCTGAAAGGAAT | GAACAAGGGCAGACG | ----- | GTGAGAGGCTC | TGGAATGAGAATACT | . . . . . | -3'  |
| CY014320 | 5'-. . . . . | AATGATTCCTGAAAGGAAT | GAACAAGGGCAGACA | ----- | GTGAGAGGCTC | TGGAATGAGAATACT | . . . . . | -3'  |
| CY014175 | 5'-. . . . . | AATGATTCCTGAAAGGAAT | GAACAAGGGCAGACA | ----- | GTGAGAGGCTC | TGGAATGAGAATACT | . . . . . | -3'  |
| DQ372598 | 5'-. . . . . | GATGATTCCTGAAAGGAAT | GAACAAGGGCAGACG | ----- | GTGAGAGGATC | AGGAATGAGAATACT | . . . . . | -3'  |
| JX235396 | 5'-. . . . . | AATGATTCCTGAAAGGAAT | GAACAAGGGCAGACA | ----- | GTGAGAGGCTC | TGGAATGAGAATACT | . . . . . | -3'  |
| CY014468 | 5'-. . . . . | GATGATTCCTGAAAGGAAT | GAACAAGGGCAGACG | ----- | GTGAGAGGCTC | TGGAATGAGAATACT | . . . . . | -3'  |
| EU146776 | 5'-. . . . . | GATGATTCCTGAAAGGAAT | GAACAAGGGCAGACG | ----- | GTGAGAGGCTC | TGGAATGAGAATACT | . . . . . | -3'  |
| CY014269 | 5'-. . . . . | GATGATTCCTGAAAGGAAT | GAACAAGGGCAGACG | ----- | GTGAGAGGCTC | TGGAATGAGAATACT | . . . . . | -3'  |
| CY014277 | 5'-. . . . . | GATGATTCCTGAAAGGAAT | GAACAAGGGCAGACG | ----- | GTGAGAGGCTC | TGGAATGAGAATACT | . . . . . | -3'  |
| CY014285 | 5'-. . . . . | GATGATTCCTGAAAGGAAT | GAACAAGGGCAGACG | ----- | GTGAGAGGCTC | TGGAATGAGAATACT | . . . . . | -3'  |
| CY014392 | 5'-. . . . . | GATGATTCCTGAAAGGAAT | GAACAAGGGCAGACG | ----- | GTGAGAGGCTC | TGGAATGAGAATACT | . . . . . | -3'  |
| CY014436 | 5'-. . . . . | GATGATTCCTGAAAGGAAT | GAACAAGGGCAGACG | ----- | GTGAGAGGCTC | TGGAATGAGAATACT | . . . . . | -3'  |
| EU146800 | 5'-. . . . . | GATGATTCCTGAAAGGAAT | GAACAAGGGCAGACG | ----- | GTGAGAGGCTC | TGGAATGAGAATACT | . . . . . | -3'  |
| CY014476 | 5'-. . . . . | GATGATTCCTGAAAGGAAT | GAACAAGGGCAGACG | ----- | GTGAGAGGCTC | TGGAATGAGAATACT | . . . . . | -3'  |
| EU146774 | 5'-. . . . . | GATGATTCCTGAAAGGAAT | GAACAAGGGCAGACG | ----- | GTGAGAGGCTC | TGGAATGAGAATACT | . . . . . | -3'  |
| HM172438 | 5'-. . . . . | GATGATTCCTGAAAGGAAT | GAACAAGGGCAGACG | ----- | GTGAGAGGCTC | AGGAATGAGAATACT | . . . . . | -3'  |
| CY014293 | 5'-. . . . . | GATGATTCCTGAAAGGAAT | GAACAAGGGCAGACG | ----- | GTGAGAGGCTC | TGGAATGAGAATACT | . . . . . | -3'  |
