# Supplementary material for: Evidence for a Novel Mechanism of Influenza Virus-Induced Type I Interferon Expression by a Defective RNA-Encoded Protein
Source: PubMed Central journal article supplement (PMC4449196; doi:10.1371/journal.ppat.1004924), 2015-05-29
Supplement: ppat.1004924.s002.pdf [file ppat.1004924.s002.pdf]

**S2 Table. Multiple sequence alignment of PB2 mRNA fragments from known avian H5N1 influenza A viruses.** All sequences were obtained from NCBI's Influenza Virus Resource (<http://www.ncbi.nlm.nih.gov/genomes/FLU/FLU.html>).

|          | 224                                       | 235 | 240                            | 254       | 1941 | 1956 | 1961 | 1969 |
|----------|-------------------------------------------|-----|--------------------------------|-----------|------|------|------|------|
|          | *                                         | *   | *                              | *         | *    | *    | *    | *    |
| CY111595 | 5'-. . . TGATTCCTGAAAGGAATGAACAAGGGCAGAC  | --- | GAATGTGAGAGGCTCAGGAATGAGAATAC  | . . . -3' |      |      |      |      |
| DQ840518 | 5'-. . . TGATTCCTGAAAGGAATGAACAAGGGCAGAC  | --- | GAATGTGAGAGGCTCAGGAATGAGAATAC  | . . . -3' |      |      |      |      |
| EU443540 | 5'-. . . TGATTCCTGAAAGGAATGAACAAGGGCAGAC  | --- | GAATGTGAGAGGCTCAGGAATGAGAATAC  | . . . -3' |      |      |      |      |
| DQ320823 | 5'-. . . TGATCCCTGAACGGAATGAACAAGGGCACAAC | --- | GAATGTGAGAGGTTCAAGGAATGAGAATAC | . . . -3' |      |      |      |      |
| DQ992710 | 5'-. . . TGATTCCTGAAAGGAATGAACAAGGGCAGAC  | --- | GAATGTGAGAGGCTCAGGAATGAGAATAC  | . . . -3' |      |      |      |      |
| CY036122 | 5'-. . . TGATCCCTGAAAGGAATGAACAAGGGCAGAC  | --- | GAATGTGAGAGGCTCAGGAATGAGGATAC  | . . . -3' |      |      |      |      |
| FJ010991 | 5'-. . . TGATTCCTGAGAGAAATGAACAAGGGCAGAC  | --- | GAATGTGAGAGGCTCAGGAATGAGAATAC  | . . . -3' |      |      |      |      |
| DQ997331 | 5'-. . . TGGTTCCTGAAAGGAATGAACAAGGGCAGAC  | --- | GAATGTGAGAGGCTCAGGGATGAGAATAC  | . . . -3' |      |      |      |      |
| EU088590 | 5'-. . . TGATTCCTGAAAGAAATGAACAAGGGCAGAC  | --- | GAATGTGAGAGGCTCAGGAATGAGAATAC  | . . . -3' |      |      |      |      |
| FJ010983 | 5'-. . . TGATTCCTGAGAGAAATGAACAAGGGCAGAC  | --- | GAATGTGAGAGGCTCAGGAATGAGAATAC  | . . . -3' |      |      |      |      |
| FJ010997 | 5'-. . . TGATTCCTGAAAGGAATGAACAAGGGCAGAC  | --- | GAATGTGAGAGGCTCAGGAATGAGAATAC  | . . . -3' |      |      |      |      |
| DQ320815 | 5'-. . . TGATCCCTGAACGGAATGAACAAGGGCACAAC | --- | GAATGTGAGAGGTTCAAGGAATGAGAATAC | . . . -3' |      |      |      |      |
| CY036114 | 5'-. . . TGATCCCTGAAAGGAATGAACAAGGGCAGAC  | --- | GAATGTGAGAGGCTCAGGAATGAGAATAC  | . . . -3' |      |      |      |      |
| AY770993 | 5'-. . . TGATTCCTGAAAGGAATGAACAAGGGCAGAC  | --- | GAATGTGAGAGGCTCAGGAATGAGAATAC  | . . . -3' |      |      |      |      |
| CY029011 | 5'-. . . TGATTCCTGAAAGGAATGAACAAGGGCAGAC  | --- | GAATGTGAGAGGCTCAGGAATGAGAATAC  | . . . -3' |      |      |      |      |
| EU889040 | 5'-. . . TGATTCCTGAAAGGAATGAACAAGGGCAGAC  | --- | GAATGTGAGAGGCTCAGGAATGAGAATAC  | . . . -3' |      |      |      |      |
| EU889046 | 5'-. . . TGATTCCTGAAAGGAATGAACAAGGGCAGAC  | --- | GAATGTTAGAGGCTCAGGAATGAGAATAC  | . . . -3' |      |      |      |      |
| EU889037 | 5'-. . . TGATTCCTGAAAGGAATGAACAAGGGCAGAC  | --- | GAATGTGAGAGGCTCAGGAATGAGAATAC  | . . . -3' |      |      |      |      |
| EU889038 | 5'-. . . TGATTCCTGAAAGGAATGAACAAGGGCAGAC  | --- | GAATGTGAGAGGCTCAGGAATGAGAATAC  | . . . -3' |      |      |      |      |
| EU889036 | 5'-. . . TGATTCCTGAAAGGAATGAACAAGGGCAGAC  | --- | GAATGTGAGAGGCTCAGGAATGAGAATAC  | . . . -3' |      |      |      |      |
| EU889045 | 5'-. . . TGATTCCTGAAAGGAATGAACAAGGGCAGAC  | --- | GAATGTTAGAGGCTCAGGAATGAGAATAC  | . . . -3' |      |      |      |      |
| EU889044 | 5'-. . . TGATTCCTGAAAGGAATGAACAAGGGCAGAC  | --- | GAATGTGAGAGGCTCAGGAATGAGAATAC  | . . . -3' |      |      |      |      |
| EU889035 | 5'-. . . TGATTCCTGAAAGGAATGAACAAGGGCAGAC  | --- | GAATGTGAGAGGCTCAGGAATGAGAATAC  | . . . -3' |      |      |      |      |
| EU889039 | 5'-. . . TGATTCCTGAAAGGAATGAACAAGGGCAGAC  | --- | GAATGTGAGAGGCTCAGGAATGAGAATAC  | . . . -3' |      |      |      |      |
| EU889041 | 5'-. . . TGATTCCTGAAAGGAATGAACAAGGGCAGAC  | --- | GAATGTGAGAGGCTCAGGAATGAGAATAC  | . . . -3' |      |      |      |      |
| EU889042 | 5'-. . . TGATTCCTGAAAGGAATGAACAAGGGCAGAC  | --- | GAATGTGAGAGGCTCAGGAATGAGAATAC  | . . . -3' |      |      |      |      |
| DQ992673 | 5'-. . . TGGTTCCTGAAAGGAATGAACAAGGGCAGAC  | --- | GAATGTGAGAGGCTCAGGAATGAGAATAC  | . . . -3' |      |      |      |      |
| DQ822557 | 5'-. . . TGATTCCTGAAAGGAATGAACAAGGGCAGAC  | --- | GAATGTGAGAGGCTCAGGAATGAGAATAC  | . . . -3' |      |      |      |      |
| DQ822558 | 5'-. . . TGATTCCTGAAAGGAATGAACAAGGGCAGAC  | --- | GAATGTGAGAGGCTCAGGAATGAGAATAC  | . . . -3' |      |      |      |      |
| DQ822559 | 5'-. . . TGATTCCTGAAAGGAATGAACAAGGGCAGAC  | --- | GAATGTGAGAGGCTCAGGAATGAGAATAC  | . . . -3' |      |      |      |      |
| JQ936692 | 5'-. . . TGATTCCTGAAAGGAATGAACAAGGGCAGAC  | --- | GAACGTGAGGGGCTCAGGAATGAGAATAC  | . . . -3' |      |      |      |      |
| FJ864697 | 5'-. . . TGATCCCTGAAAGAAATGAGCAGGGTCAGAC  | --- | GAACGTGAGGGGTTCAAGGAATGAGAATAC | . . . -3' |      |      |      |      |
| FJ864698 | 5'-. . . TGATCCCTGAAAGAAATGAGCAGGGTCAGAC  | --- | GAACGTGAGGGGTTCAAGGAATGAGAATAC | . . . -3' |      |      |      |      |
| CY029340 | 5'-. . . TGATTCCTGAAAGGAATGAACAAGGGCAGAC  | --- | GAATGTGAGAGGCTCAGGAATGAGAATAC  | . . . -3' |      |      |      |      |
| KF597834 | 5'-. . . TGATTCCTGAAAGGAATGAACAAGGGCAGAC  | --- | GAATGTGAGAGGCTCAGGAATGAGAATAC  | . . . -3' |      |      |      |      |
| DQ100543 | 5'-. . . TGATTCCTGAAAGGAATGAACAAGGGCAGAC  | --- | GAATGTGAGAGGCTCAGGAATGAGAATAC  | . . . -3' |      |      |      |      |
| DQ100545 | 5'-. . . TGATTCCTGAAAGGAATGAACAAGGGCAGAC  | --- | GAATGTGAGAGGCTCAGGAATGAGAATAC  | . . . -3' |      |      |      |      |
| DQ100544 | 5'-. . . TGATTCCTGAAAGGAATGAACAAGGGCAGAC  | --- | GAATGTGAGAGGCTCAGGAATGAGAATAC  | . . . -3' |      |      |      |      |
| DQ100542 | 5'-. . . TGATTCCTGAAAGGAATGAACAAGGGCAGAC  | --- | GAATGTGAGAGGCTCAGGAATGAGAATAC  | . . . -3' |      |      |      |      |
| EU088598 | 5'-. . . TGGTTCCTGAAAGGAATGAACAAGGGCAGAC  | --- | GAATGTGAGAGGCTCAGGAATGAGAATAC  | . . . -3' |      |      |      |      |
| CY029081 | 5'-. . . TGATTCCTGAAAGGAATGAACAAGGGCAGAC  | --- | GAATGTGAGAGGCTCAGGAATGAGAATAC  | . . . -3' |      |      |      |      |
| CY036130 | 5'-. . . TGGTTCCTGAAAGGAATGAACAAGGGCAGAC  | --- | GAATGTGAGAGGCTCAGGAATGAGAATAC  | . . . -3' |      |      |      |      |
| CY036138 | 5'-. . . TGGTTCCTGAAAGGAATGAACAAGGGCAGAC  | --- | GAATGTGAGAGGCTCAGGAATGAGAATAC  | . . . -3' |      |      |      |      |
| CY029137 | 5'-. . . TGATTCCTGAAAGGAATGAACAAGGGCAGAC  | --- | GAATGTGAGAGGCTCAGGAATGAGAATAC  | . . . -3' |      |      |      |      |
| DQ320819 | 5'-. . . TGATCCCTGAACGGAATGAACAAGGGCACAAC | --- | GAATGTGAGAGGTTCAAGGAATGAGAATAC | . . . -3' |      |      |      |      |
| CY029074 | 5'-. . . TGATTCCTGAAAGGAATGAACAAGGGCACAAC | --- | GAATGTGAGAGGCTCAGGAATGAGAATAC  | . . . -3' |      |      |      |      |
| DQ992637 | 5'-. . . TGATTCCTGAAAGGAATGAACAAGGGCAGAC  | --- | GAATGTGAGAGGCTCAGGAATGAGAATAC  | . . . -3' |      |      |      |      |
| CY036106 | 5'-. . . TGATCCCTGAAAGGAATGAACAAGGGCAGAC  | --- | GAATGTGAGAGGCTCAGGAATGAGGATAC  | . . . -3' |      |      |      |      |
| CY029067 | 5'-. . . TGATTCCTGAAAGGAATGAACAAGGGCACAAC | --- | GAATGTGAGAGGCTCAGGAATGAGAATAC  | . . . -3' |      |      |      |      |
| CY029221 | 5'-. . . TGATTCCTGAAAGGAATGAACAAGGGCAGAC  | --- | GAATGTGAGAGGCTCAGGAATGAGAATAC  | . . . -3' |      |      |      |      |
| CY029396 | 5'-. . . TGATTCCTGAAAGGAATGAACAAGGGCAGAC  | --- | GAATGTGAGAGGCTCAGGAATGAGAATAC  | . . . -3' |      |      |      |      |
| DQ520852 | 5'-. . . TGATTCCTGAAAGGAATGAACAAGGGCAGAC  | --- | GAATGTGAGAGGCTCAGGAATGAGAATAC  | . . . -3' |      |      |      |      |
| JN588935 | 5'-. . . TGATCCCTGAAAGGAATGAACAAGGGCAGAC  | --- | GAATGTGAGAGGCTCAGGAATGAGAATAC  | . . . -3' |      |      |      |      |
| CY028997 | 5'-. . . TGATTCCTGAAAGGAATGAACAAGGGCAGAC  | --- | GAATGTGAGAGGCTCAGGAATGAGAATAC  | . . . -3' |      |      |      |      |
| CY029165 | 5'-. . . TGATCCCTGAACGGAATGAACAAGGGCAGAC  | --- | GAATGTGAGAGGTTCAAGGAATGAGAATAC | . . . -3' |      |      |      |      |
| CY029046 | 5'-. . . TGATTCCTGAAAGGAATGAACAAGGGCACAAC | --- | GAATGTGAGAGGCTCAGGAATGAGAATAC  | . . . -3' |      |      |      |      |
| DQ992697 | 5'-. . . TGATCCCTGAAAGAAATGAGCAGGGTCAAAC  | --- | GAACGTGAGAGGCTCAGGAATGAGAATAC  | . . . -3' |      |      |      |      |
| HQ200551 | 5'-. . . TGATTCCTGAAAGGAATGAACAAGGGCAGAC  | --- | GAATGTGAGAGGCTCAGGAATGAGAATAC  | . . . -3' |      |      |      |      |
| HQ200530 | 5'-. . . TGATTCCTGAAAGGAATGAACAAGGGCAGAC  | --- | GAATGTGAGAGGCTCAGGAATGAGAATAC  | . . . -3' |      |      |      |      |
| JQ936716 | 5'-. . . TGATTCCTGAAAGGAATGAACAAGGGCAGAC  | --- | GAACGTGAGGGGCTCAGGAATGAGAATAC  | . . . -3' |      |      |      |      |
| JQ936724 | 5'-. . . TGATTCCTGAAAGGAATGAACAAGGGCAGAC  | --- | GAATGTGAGAGGCTCAGGAATGAGAATAC  | . . . -3' |      |      |      |      |
| EU620659 | 5'-. . . TGATTCCTGAAAGGAATGAACAAGGGCAGAC  | --- | GAATGTGAGAGGATCAGGAATGAGAATAC  | . . . -3' |      |      |      |      |
| EU620667 | 5'-. . . TGATTCCTGAAAGGAATGAACAAGGGCAGAC  | --- | GAATGTGAGAGGATCAGGAATGAGAATAC  | . . . -3' |      |      |      |      |























|          | 224 | 235 | 240                              | 254 | 1941                          | 1956 | 1961 | 1969 |
|----------|-----|-----|----------------------------------|-----|-------------------------------|------|------|------|
|          | *   | *   | *                                | *   | *                             | *    | *    | *    |
| DQ992677 | 5'  | ... | TGATTCCTGAAAGGAATGAACAGGGGCAGAC  | --- | GAATGTGAGAGGCTCAGGAATGAGAATAC | ...  | -3'  |      |
| HM172426 | 5'  | ... | TGATTCCTGAAAGGAATGAACAGGGCAGAC   | --- | GAATGTTAGAGGCTCAGGAATGAGAATAC | ...  | -3'  |      |
| CY029732 | 5'  | ... | TGATTCCTGAAAGGAATGAACAGGGGCAGAC  | --- | GAATGTGAGAGGCTCAGGAATGAGGATAC | ...  | -3'  |      |
| AY585511 | 5'  | ... | TGATTCCTGAAAGGAATGAACAGGGGCAGAC  | --- | GAATGTGAGAGGCTCAGGAATGAGAATAC | ...  | -3'  |      |
| CY048176 | 5'  | ... | TGATTCCTGAAAGGAATGAACAGGGCAGAC   | --- | GAATGTGAGAGGCTCCGGAATGAGAATAC | ...  | -3'  |      |
| DQ992678 | 5'  | ... | TGATTCCTGAAAGGAATGAACAGGGGCAGAC  | --- | GAATGTGAGAGGCTCAGGAATGAGAATAC | ...  | -3'  |      |
| DQ992700 | 5'  | ... | TGATTCCTGAAAGGAATGAACAGGGGCAGAC  | --- | GAATGTGAGAGGCTCAGGAATGAGAATAC | ...  | -3'  |      |
| HM172416 | 5'  | ... | TGATTCCTGAAAGGAATGAACAGGGCAAAC   | --- | GAATGTGAGAGGCTCTGGAATGAGAATAC | ...  | -3'  |      |
| GQ122508 | 5'  | ... | TGATTCCTGAAAGGAATGAACAGGGCAGAC   | --- | GAATGTGAGAGGCTCTGGAATGAGAATAC | ...  | -3'  |      |
| GQ122466 | 5'  | ... | TGATTCCTGAAAGGAATGAACAGGGGCAGAC  | --- | GAATGTGAGAGGCTCTGGAATGAGAATAC | ...  | -3'  |      |
| GQ122472 | 5'  | ... | TGATTCCTGAAAGGAATGAACAGGGCAGAC   | --- | GAATGTGAGAGGCTCTGGAATGAGAATAC | ...  | -3'  |      |
| DQ992574 | 5'  | ... | TGATTCCTGAAAGGAATGAACAGGGGCAGAC  | --- | GAATGTGAGAGGCTCAGGAATGAGAATAC | ...  | -3'  |      |
| DQ992680 | 5'  | ... | TGATTCCTGAAAGGAATGAACAGGGGCAGAC  | --- | GAATGTGAGAGGCTCAGGAATGAGAATAC | ...  | -3'  |      |
| GQ122484 | 5'  | ... | TGATTCCTGAAAGGAATGAACAGGGGCAGAC  | --- | GAATGTGAGAGGCTCTGGAATGAGAATAC | ...  | -3'  |      |
| GQ122490 | 5'  | ... | TGATTCCTGAAAGGAATGAACAGGGGCAGAC  | --- | GAATGTGAGAGGCTCTGGAATGAGAATAC | ...  | -3'  |      |
| GQ122478 | 5'  | ... | TGATTCCTGAAAGGAATGAACAGGGGCAGAC  | --- | GAATGTGAGAGGCTCTGGAATGAGAATAC | ...  | -3'  |      |
| HM172431 | 5'  | ... | TGGTTCCTGAAAGGAATGAACAGGGCAAAC   | --- | GAATGTGAGAGGCTCAGGAATGAGAATAC | ...  | -3'  |      |
| CY029620 | 5'  | ... | TGATTCCTGAAAGGAATGAACAGGGGCAGAC  | --- | GAATGTAAGAGGCTCAGGAATGAGAATAC | ...  | -3'  |      |
| DQ320869 | 5'  | ... | TGATTCCTGAAAGGAATGAACAGGGGCAGAC  | --- | GAATGTGAGAGGCTCTGGAATGAGAATAC | ...  | -3'  |      |
| CY041027 | 5'  | ... | TGATTCCTGAAAGGAATGAACAGGGGCAGAC  | --- | GAATGTGAGAGGCTCAGGGATGAGAATAC | ...  | -3'  |      |
| JX420211 | 5'  | ... | TGATTCCTGAAAGGAATGAACAGGGGCAGAC  | --- | GAATGTGAGAGGCTCAGGAATGAGAATAC | ...  | -3'  |      |
| HM172434 | 5'  | ... | TGGTTCCTGAAAGGAATGAACAGGGCAAAC   | --- | GAATGTGAAAGGCTCAGGAATGAGAATAC | ...  | -3'  |      |
| DQ992635 | 5'  | ... | TGATTCCTGAAAGGAATGAACAGGGGCAGAC  | --- | GAATATGAGAGGCTCAGGAATGAGAATAC | ...  | -3'  |      |
| DQ492826 | 5'  | ... | TGATTCCTGAAAGGAATGAACAGGGGCAGAC  | --- | GAATGTGAGAGGCTCTGGAATGAGAATAC | ...  | -3'  |      |
| CY036242 | 5'  | ... | TGATTCCTGAAAGGAATGAACAGGGGCAGAC  | --- | GAATGTGAGAGGCTCAGGAATGAGAATAC | ...  | -3'  |      |
| CY029564 | 5'  | ... | TGATTCCTGAAAGGAATGAACAGGGGCAGAC  | --- | GAATGTGAGAGGCTCAGGAATGAGAATAC | ...  | -3'  |      |
| DQ320867 | 5'  | ... | TGATTCCTGAAAGGAATGAACAGGGGCAGAC  | --- | GAATGTGAGAGGCTCTGGAATGAGAATAC | ...  | -3'  |      |
| CY061291 | 5'  | ... | TGATTCCTGAAAGGAATGAACAGGGCAGAC   | --- | GAATGTGAGAGGCTCAGGAATGAGAATAC | ...  | -3'  |      |
| CY090113 | 5'  | ... | TGATTCCTGAAAGGAATGAACAGGGCAGAC   | --- | GAATGTGAGAGGCTCAGGAATGAGAATAC | ...  | -3'  |      |
| JQ936700 | 5'  | ... | TGATTCAGAAAGGAATGAACAAGGCAGAC    | --- | GAATGTGAGAGGCTCAGGAATGAGAATAC | ...  | -3'  |      |
| DQ492819 | 5'  | ... | TGATTCCTGAAAGGAATGAACAGGGGCAGAC  | --- | GAATGTGAGAGGCTCTGGAATGAGAATAC | ...  | -3'  |      |
| GU182147 | 5'  | ... | TGATTCCTGAAAGGAATGAACAGGGGCAGAC  | --- | GAATGTAAGAGGCTCAGGAATGAGAATAC | ...  | -3'  |      |
| DQ992676 | 5'  | ... | TGATTCCTGAAAGGAATGAACAGGGGCAGAC  | --- | GAATGTGAGAGGCTCAGGAATGAGAATAC | ...  | -3'  |      |
| CY029025 | 5'  | ... | TGATTCCTGAAAGGAATGAACAGGGGCAGAC  | --- | GAATGTGAGAGGCTCAGGAATGAGAATAC | ...  | -3'  |      |
| CY041019 | 5'  | ... | TGATTCCTGAAAGGAATGAACAGGGGCAGAC  | --- | GAATGTGAGAGGCTCAGGGATGAGAATAC | ...  | -3'  |      |
| CY126017 | 5'  | ... | TGATTCCTGAAAGAAATGAACAGGCAGAC    | --- | GAATGTTAGAGGCTCAGGGATGAGAATAC | ...  | -3'  |      |
| CY048160 | 5'  | ... | TGATTCCTGAAAGAAATGAACAGGCAGAC    | --- | GAATGTGAGAGGCTCCGGAATGAGAATAC | ...  | -3'  |      |
| HM172433 | 5'  | ... | TGGTTCCTGAAAGGAATGAACAGGGCAAAC   | --- | GAATGTGAGAGGCTCAGGAATGAGAATAC | ...  | -3'  |      |
| DQ492842 | 5'  | ... | TGATTCCTGAAAGGAATGAACAGGGGCAGAC  | --- | GAATGTGAGAGGCTCTGGAATGAGAATAC | ...  | -3'  |      |
| CY041305 | 5'  | ... | TGATTCCTGAAAGGAATGAACAGGGGCAGAC  | --- | GAATGTTAGAGGCTCAGGAATGAGAATAC | ...  | -3'  |      |
| DQ992675 | 5'  | ... | TGATTCCTGAAAGGAATGAACAGGGGCAGAC  | --- | GAATGTGAGAGGCTCAGGAATGAGAATAC | ...  | -3'  |      |
| JX420219 | 5'  | ... | TGATTCCTGAAAGGAATGAACAGGGGCAGAC  | --- | GAATGTGAGAGGCTCAGGAATGAGAATAC | ...  | -3'  |      |
| CY036194 | 5'  | ... | TGATTCCTGAAAGGAATGAACAGGGGCAGAC  | --- | GAATGTGAGAGGCTCAGGAATGAGAATAC | ...  | -3'  |      |
| DQ492834 | 5'  | ... | TGATTCCTGAAAGGAATGAACAGGGGCAGAC  | --- | GAATGTGAGAGGCTCTGGAATGAGAATAC | ...  | -3'  |      |
| HM172407 | 5'  | ... | TGATTCCTGAAAGGAATGAACAGGGGCAGAC  | --- | GAATGTGAGAGGCTCAGGAATGAGGATAA | ...  | -3'  |      |
| FJ784827 | 5'  | ... | TGATTCCTGAAAGGAATGAACAGGGGCAGAC  | --- | GAATGTGAGAGGCTCAGGAATGAGAATAC | ...  | -3'  |      |
| CY041011 | 5'  | ... | TGATTCCTGAAAGGAATGAACAGGGGCAGAC  | --- | GAATGTGAGAGGCTCAGGGATGAGAATAC | ...  | -3'  |      |
| CY041003 | 5'  | ... | TGATTCCTGAAAGGAATGAACAGGGGCAGAC  | --- | GAATGTGAGAGGCTCAGGGATGAGAATAC | ...  | -3'  |      |
| AB499529 | 5'  | ... | TGATTCCTGAAAGGAATGAACAGGGGCAGAC  | --- | GAATGTGAGAGGCTCAGGGATGAGAATAC | ...  | -3'  |      |
| FR687273 | 5'  | ... | TGATTCCTGAAAGAAATGAACAAGGCAGAC   | --- | GAATGTTAGAGGCTCAGGAATGAGAATAC | ...  | -3'  |      |
| HM172420 | 5'  | ... | TGGTTCCTGAAAGGAATGAACAGGGCAAAC   | --- | GAATGTGAGAGGCTCAGGAATGAGAATAC | ...  | -3'  |      |
| JQ936684 | 5'  | ... | TGATTCAGAAAGGAATGAACAAGGCAGAC    | --- | GAATGTGAGAGGCTCAGGAATGAGAATAC | ...  | -3'  |      |
| KC261448 | 5'  | ... | TGATTCAGAAAGGAATGAACAAGGGCAGAC   | --- | GAATGTAAGAGGCTCAGGAATGAGAATAC | ...  | -3'  |      |
| DQ492827 | 5'  | ... | TGATTCCTGAAAGGAATGAACAGGGGCAGAC  | --- | GAATGTGAGAGGCTCTGGAATGAGAATAC | ...  | -3'  |      |
| CY030520 | 5'  | ... | TGATACCTGAAAGGAATGAACAAGGGCAGAC  | --- | GAATGTGAGAGGCTCAGGAATGAGAATAC | ...  | -3'  |      |
| DQ492825 | 5'  | ... | TGATTCCTGAAAGGAATGAACAAGGGGCAGAC | --- | GAATGTGAGAGGCTCTGGAATGAGAATAC | ...  | -3'  |      |
| DQ492840 | 5'  | ... | TGATTCCTGAAAGGAATGAACAAGGGGCAGAC | --- | GAATGTGAGAGGCTCTGGAATGAGAATAC | ...  | -3'  |      |
| DQ320866 | 5'  | ... | TGATTCCTGAAAGGAATGAACAAGGGGCAGAC | --- | GAATGTGAGAGGCTCTGGAATGAGAATAC | ...  | -3'  |      |
| FR687274 | 5'  | ... | TGATTCCTGAAAGAAATGAACAAGGCAGAC   | --- | GAATGTTAGAGGCTCAGGAATGAGAATAC | ...  | -3'  |      |
| CY040987 | 5'  | ... | TGATTCCTGAAAGGAATGAACAAGGGGCAGAC | --- | GAATGTGAGAGGCTCAGGGATGAGAATAC | ...  | -3'  |      |
| FJ784829 | 5'  | ... | TGATTCCTGAAAGGAATGAACAAGGGGCAGAC | --- | GAATGTGAGAGGCTCAGGAATGAGAATAC | ...  | -3'  |      |
| GQ412036 | 5'  | ... | TGATTCCTGAAAGGAATGAACAAGGGGCAGAC | --- | GAATGTAAGAGGCTCAGGAATGAGAATAC | ...  | -3'  |      |
| GQ412035 | 5'  | ... | TGATTCCTGAAAGGAATGAACAAGGGGCAGAC | --- | GAATGTAAGAGGCTCAGGAATGAGAATAC | ...  | -3'  |      |
| KJ028471 | 5'  | ... | TGATTCCTGAAAGGAATGAACAAGGGGCAGAC | --- | GAATGTGAGAGGCTCAGGAATGAGAATAC | ...  | -3'  |      |
| CY036226 | 5'  | ... | TGATTCCTGAAAGGAATGAACAAGGGGCAGAC | --- | GAATGTGAGAGGCTCAGGAATGAGAATAC | ...  | -3'  |      |
| GQ412037 | 5'  | ... | TGATTCCTGAAAGGAATGAACAAGGGGCAGAC | --- | GAATGTAAGAGGCTCAGGAATGAGAATAC | ...  | -3'  |      |
| CY036218 | 5'  | ... | TGATTCCTGAAAGGAATGAACAAGGGGCAGAC | --- | GAATGTGAGAGGCTCAGGAATGAGAATAC | ...  | -3'  |      |
| GQ412033 | 5'  | ... | TGATTCCTGAAAGGAATGAACAAGGGGCAGAC | --- | GAATGTAAGAGGCTCAGGAATGAGAATAC | ...  | -3'  |      |
| HM172424 | 5'  | ... | TGATTCCTGAAAGGAATGAACAAGGCAGAC   | --- | GAATGTTAGAGGCTCAGGAATGAGAATAC | ...  | -3'  |      |
| DQ492843 | 5'  | ... | TGATTCCTGAAAGGAATGAACAAGGGCAAAC  | --- | GAATGTGAGAGGCTCTGGAATGAGAATAC | ...  | -3'  |      |







|          | 224 | 235 | 240                              | 254 | 1941                   | 1956     | 1961 | 1969 |
|----------|-----|-----|----------------------------------|-----|------------------------|----------|------|------|
|          | *   | *   | *                                | *   | *                      | *        | *    | *    |
| JN646692 | 5'  | ... | TGATCCCTGAACGAAATGAACAGGGACAGAC  | --- | GAACGTGAGAGGCTCAGGAAT  | GAGAATAC | ...  | -3'  |
| DQ992569 | 5'  | ... | TGATCCCTGAACGAAATGAACAGGGACAAAC  | --- | GAATGTGAGAGGTTTCAGGAAT | GAGAATAC | ...  | -3'  |
| JN646697 | 5'  | ... | TGATCCCTGAACGAAATGAACAGGGGCAGAC  | --- | GAACGTGAGAGGTTTCAGGAAT | GAGAATAC | ...  | -3'  |
| DQ073399 | 5'  | ... | TGATCCCTGAAAGGAATGAACAAGGGCAGAT  | --- | GAATGTAAGAGGGTCAGGGAT  | GAGAATAC | ...  | -3'  |
| DQ073400 | 5'  | ... | TGATCCCTGAAAGGAATGAACAAGGGCAGAC  | --- | GAATGTGAGGGGCTCAGGAAT  | GAGAATAC | ...  | -3'  |
| FJ784826 | 5'  | ... | TGATCCCTGAAAGAAATGAGCAAGGTCAGAC  | --- | GAACGTAAGAGGGCTCAGGAAT | GAGAATAC | ...  | -3'  |
| DQ073401 | 5'  | ... | TGATCCCTGAAAGAAATGAGCAAGGTCAAAC  | --- | GAATGTGAGGGGCTCAGGAAT  | GAGAATAC | ...  | -3'  |
| FJ784833 | 5'  | ... | TGATCCCTGAAAGAAATGAGCAAGGTCAGAC  | --- | AAACGTGAGGGGTTTCAGGAAT | GAGAATAC | ...  | -3'  |
| FJ784838 | 5'  | ... | TGATCCCTGAAAGAAATGAGCAAGGTCAGAC  | --- | GAACGTGAGGGGTTTCAGGAAT | GAGAATAC | ...  | -3'  |
| KC815848 | 5'  | ... | TGATCCCTGAAAGGAATGAACAAGGTCAAAC  | --- | AAACGTGAGGGGTTTCAGGAAT | GAGGATAC | ...  | -3'  |
| KC815856 | 5'  | ... | TGATCCCTGAAAGGAATGAACAAGGTCAAAC  | --- | AAACGTGAGGGGTTTCAGGAAT | GAGGATAC | ...  | -3'  |
| KC815872 | 5'  | ... | TGATCCCTGAAAGGAATGAACAAGGTCAAAC  | --- | AAACGTGAGGGGTTTCAGGAAT | GAGGATAC | ...  | -3'  |
| GU220792 | 5'  | ... | TGATCCCTGAAAGAAATGAGCAAGGTCAGAC  | --- | GAACGTGAGGGGTTTCAGGAAT | GAGAATAC | ...  | -3'  |
| FJ784837 | 5'  | ... | TGATCCCTGAAAGAAATGAGCAAGGTCAGAC  | --- | GAACGTGAGGGGTTTCAGGAAT | GAGAATAC | ...  | -3'  |
| FJ784825 | 5'  | ... | TGATCCCTGAAAGAAATGAGCAAGGTCAGAC  | --- | GAACGTGAGGGGTTTCAGGAAT | GAGAATAC | ...  | -3'  |
| DQ992684 | 5'  | ... | TGATCCCTGAAAGAAATGAGCAAGGTCAAAC  | --- | GAACGTGAGGGGCTCAGGAAT  | GAGAATAC | ...  | -3'  |
| FJ784836 | 5'  | ... | TGATCCCTGAAAGAAATGAGCAAGGTCAGAC  | --- | GAACGTGAGGGGTTTCAGGAAT | GAGAATAC | ...  | -3'  |
| FJ784835 | 5'  | ... | TGATCCCTGAAAGAAATGAGCAAGGTCAGAC  | --- | GAACGTGAGGGGTTTCAGGAAT | GAGAATAC | ...  | -3'  |
| CY046179 | 5'  | ... | TGATCCCTGAAAGAAATGAGCAAGGTCAGAC  | --- | GAACGTGAGGGGTTTCAGGAAT | GAGAATAC | ...  | -3'  |
| FJ784830 | 5'  | ... | TGATCCCTGAAAGAAATGAGCAAGGTCAGAC  | --- | GAACGTGAGGGGTTTCAGGAAT | GAGAATAC | ...  | -3'  |
| FJ784828 | 5'  | ... | TGATCCCTGAAAGAAATGAGCAAGGTCAGAC  | --- | GAACGTGAGGGGTTTCAGGAAT | GAGAATAC | ...  | -3'  |
| AB212277 | 5'  | ... | TAATCCCTGAAAGAAATGAGCAAGGTCAGAC  | --- | GAACGTGAGGGGCTCAGGAAT  | GAGAATAC | ...  | -3'  |
| KC815864 | 5'  | ... | TGATCCCTGAAAGGAATGAACAAGGTCAAAC  | --- | AAACGTGAGGGGTTTCAGGAAT | GAGAATAC | ...  | -3'  |
| EU195389 | 5'  | ... | TGATCCCGAAAGAAATGAGCAAGGTCAAAC   | --- | GAACGTGAGGGGTTTCAGGAAT | GAGAATAC | ...  | -3'  |
| CY040971 | 5'  | ... | TGATCCCGAAAGAAATGAGCAAGGTCAGAC   | --- | GAACGTGAGGGGTTTCAGGAAT | GAGAATAC | ...  | -3'  |
| CY040923 | 5'  | ... | TGATCCCGAAAGAAATGAGCAAGGTCAGAC   | --- | GAACGTGAGGGGTTTCAGGAAT | GAGAATAC | ...  | -3'  |
| CY030998 | 5'  | ... | TGATCCCTGAAAGAAATGAGCAAGGTCAAAC  | --- | GAACGTGAGGGGTTTCAGGAAT | GAGAATAC | ...  | -3'  |
| JF758818 | 5'  | ... | TGATCCCTGARAGRAATGARCARGGACAAAC  | --- | GAATGTAAGGGGATCAGGAAT  | GAGAATAC | ...  | -3'  |
| JF758815 | 5'  | ... | TGATCCCTGAAAGAAATGAACAGGGACAAAC  | --- | GAATGTAAGGGGATCAGGAAT  | GAGAATAC | ...  | -3'  |
| CY036702 | 5'  | ... | TGATCCCTGAAAGGAATGAACAAGGGCAGAC  | --- | GAATGTGAGAGGCTCAGGAAT  | GAGAATAC | ...  | -3'  |
| EU148387 | 5'  | ... | TGATCCCTGAAAGGAATGAACAAGGGCAGAC  | --- | GAATGTGAGAGGCTCAGGAAT  | GAGAATAC | ...  | -3'  |
| CY094806 | 5'  | ... | TGATCCCTGAAAGGAATGAACAAGGGCAGAC  | --- | GAATGTGAGAGGCTCAGGAAT  | GAGAATAC | ...  | -3'  |
| DQ990000 | 5'  | ... | TGATCCCTGAAAGGAATGAACAAGGGCAGAC  | --- | GAATGTGAGAGGCTCAGGAAT  | GAGAATAC | ...  | -3'  |
| EU616866 | 5'  | ... | TGATCCCTGAAAGGAATGAACAAGGGCAGAC  | --- | GAATGTGAGAGGCTCAGGAAT  | GAGAATAC | ...  | -3'  |
| CY045406 | 5'  | ... | TGATCCCTGAAAGAAATGAACAGGGACAAAC  | --- | GAATGTAAGGGGATCAGGAAT  | GAGAATAC | ...  | -3'  |
| CY033176 | 5'  | ... | TGATCCCTGAAAGGAATGAACAAGGGCAGAC  | --- | GAATGTGAGAGGCTCAGGAAT  | GAGAATAC | ...  | -3'  |
| CY034205 | 5'  | ... | TGATCCCTGAAAGGAATGAACAAGGGCAGAC  | --- | GAATGTGAGAGGCTCAGGAAT  | GAGAATAC | ...  | -3'  |
| CY020644 | 5'  | ... | TGATCCCTGAAAGGAATGAACAAGGGCAGAC  | --- | GAATGTGAGAGGCTCAGGAAT  | GAGAATAC | ...  | -3'  |
| CY017034 | 5'  | ... | TGATCCCTGAAAGGAATGAACAAGGGCAGAC  | --- | GAATGTGAGAGGCTCAGGAAT  | GAGAATAC | ...  | -3'  |
| CY036718 | 5'  | ... | TGATCCCTGAAAGGAATGAACAAGGGCAGAC  | --- | GAATGTGAGAGGCTCAGGAAT  | GAGAATAC | ...  | -3'  |
| EU148451 | 5'  | ... | TGATCCCTGAAAGGAATGAACAAGGGCAGAC  | --- | GAATGTGAGAGGCTCAGGAAT  | GAGAATAC | ...  | -3'  |
| CY016834 | 5'  | ... | TGATCCCTGAAAGGAATGAACAAGGGCAGAC  | --- | GAATGTGAGAGGCTCAGGAAT  | GAGAATAC | ...  | -3'  |
| CY016874 | 5'  | ... | TGATCCCTGAAAGGAATGAACAAGGGCAGAC  | --- | GAATGTGAGAGGCTCAGGAAT  | GAGAATAC | ...  | -3'  |
| CY017058 | 5'  | ... | TGATCCCTGAAAGGAATGAACAAGGGCAGAC  | --- | GAATGTGAGAGGCTCAGGAAT  | GAGAATAC | ...  | -3'  |
| CY043935 | 5'  | ... | TGATCCCTGAAAGAAATGAACAGGGACAAAC  | --- | GAATGTAAGGGGATCAGGAAT  | GAGAATAC | ...  | -3'  |
| CY031179 | 5'  | ... | TGATCCCTGAAAGGAATGAACAAGGGCAGAC  | --- | GAATGTGAGAGGCTCAGGAAT  | GAGAATAC | ...  | -3'  |
| EF112210 | 5'  | ... | TGATCCCTGAAAGGAATGAACAAGGGCAGAC  | --- | GAATGTGAGAGGCTCAGGAAT  | GAGAATAC | ...  | -3'  |
| AY038798 | 5'  | ... | TGATCCCTGAAAGGAATGAACAAGGGACAAAC | --- | GAATGTGAGAGGCTCAGGAAT  | GAGAATAC | ...  | -3'  |
| HM627910 | 5'  | ... | TGATCCCTGAAAGGAATGAACAAGGGCAGAC  | --- | GAATGTGAGAGGCTCAGGAAT  | GAGAATAC | ...  | -3'  |
| AB593444 | 5'  | ... | TGATCCCTGAAAGGAATGAACAAGGGCAGAC  | --- | GAATGTGAGAGGCTCAGGAAT  | GAGGATAC | ...  | -3'  |
| CY016946 | 5'  | ... | TGATCCCTGAAAGGAATGAACAAGGGCAGAC  | --- | GAATGTGAGAGGCTCAGGAAT  | GAGAATAC | ...  | -3'  |
| EU148403 | 5'  | ... | TGATCCCTGAAAGGAATGAACAAGGGCAGAC  | --- | GAATGTGAGAGGCTCAGGAAT  | GAGAATAC | ...  | -3'  |
| EF112213 | 5'  | ... | TGATCCCTGAAAGGAATGAACAAGGGCAGAC  | --- | GAATGTGAGAGGCTCAGGAAT  | GAGAATAC | ...  | -3'  |
| CY020668 | 5'  | ... | TGATCCCTGAAAGGAATGAACAAGGGCAGAC  | --- | GAATGTTAGAGGCTCAGGAAT  | GAGAATAC | ...  | -3'  |
| EF112218 | 5'  | ... | TGATCCCTGAAAGGAATGAACAAGGGCAGAC  | --- | GAATGTGAGAGGCTCAGGAAT  | GAGAATAC | ...  | -3'  |
| EF112206 | 5'  | ... | TGATCCCTGAAAGGAATGAACAAGGGCAGAC  | --- | GAATGTGAGAGGCTCAGGAAT  | GAGAATAC | ...  | -3'  |
| CY016954 | 5'  | ... | TGATCCCTGAAAGGAATGAACAAGGGCAGAC  | --- | GAATGTGAGAGGCTCAGGAAT  | GAGAATAC | ...  | -3'  |
| CY029944 | 5'  | ... | TGATCCCTGAAAGGAATGAACAAGGGCAGAC  | --- | GAATGTGAGAGGCTCAGGAAT  | GAGAATAC | ...  | -3'  |
| CY028723 | 5'  | ... | TGATCCCTGAAAGGAATGAACAAGGGCAGAC  | --- | GAATGTGAGAGGCTCAGGAAT  | GAGAATAC | ...  | -3'  |
| CY036710 | 5'  | ... | TGATCCCTGAAAGGAATGAACAAGGGCAGAC  | --- | GAATGTGAGAGGCTCAGGAAT  | GAGAATAC | ...  | -3'  |
| JQ714224 | 5'  | ... | TGATCCCTGAAAGGAATGAACAAGGGCAGAC  | --- | GAATGTGAGAGGCTCAGGAAT  | GAGAATAC | ...  | -3'  |
| JQ714232 | 5'  | ... | TGATCCCTGAAAGGAATGAACAAGGGCAGAC  | --- | GAATGTGAGAGGCTCAGGAAT  | GAGAATAC | ...  | -3'  |
| CY053332 | 5'  | ... | TGATCCCTGAAAGAAATGAACAGGGACAAAC  | --- | GAATGTAAGGGGATCAGGAAT  | GAGAATAC | ...  | -3'  |
| AY651728 | 5'  | ... | TGATCCCTGAAAGGAATGAACAAGGGCAGAC  | --- | GAATGTGAGAGGCTCAGGAAT  | GAGAATAC | ...  | -3'  |
| CY020356 | 5'  | ... | TGATCCCTGAAAGGAATGAACAAGGGCAGAC  | --- | GAATGTTAGAGGCTCAGGAAT  | GAGAATAC | ...  | -3'  |
| DQ323675 | 5'  | ... | TGATCCCTGAAAGGAATGAACAAGGGCAGAC  | --- | GAATGTTAGAGGCTCAGGAAT  | GAGAATAC | ...  | -3'  |
| EU148395 | 5'  | ... | TGATCCCTGAAAGGAATGAACAAGGGCAGAC  | --- | GAATGTGAGAGGCTCAGGAAT  | GAGAATAC | ...  | -3'  |
| DQ989984 | 5'  | ... | TGATCCCTGAAAGGAATGAACAAGGGCAGAC  | --- | GAATGTGAGAGGCTCAGGAAT  | GAGAATAC | ...  | -3'  |
| EF112221 | 5'  | ... | TGATCCCTGAAAGGAATGAACAAGGGCAGAC  | --- | GAATGTGAGAGGCTCAGGAAT  | GAGAATAC | ...  | -3'  |
| CY053884 | 5'  | ... | TGATCCCTGAAAGAAATGAACAGGGACAAAC  | --- | GAATGTAAGGGGATCAGGAAT  | GAGAATAC | ...  | -3'  |





















|          | 224                                       | 235 | 240 | 254 | 1941 | 1956                           | 1961 | 1969   |
|----------|-------------------------------------------|-----|-----|-----|------|--------------------------------|------|--------|
|          | *                                         | *   | *   | *   | *    | *                              | *    | *      |
| CY092115 | 5'-. . . TGATTCCTGAAAGGAATGAACATGGGCAGAC  |     |     |     | ---  | GAATGTGAGAGGCTCAGGAATGAGAATAC  |      | ...-3' |
| JX534586 | 5'-. . . TGATTCCTGAAAGGAATGAACAAGGGCAGAC  |     |     |     | ---  | GAATGTGAGGGGATCAGGAATGAGAATAT  |      | ...-3' |
| CY092127 | 5'-. . . TGATTCCTGAAAGGAATGAACATGGGCAGAC  |     |     |     | ---  | GAATGTGAGAGGCTCAGGAATGAGAATAC  |      | ...-3' |
| KF881593 | 5'-. . . TGATCCCTGAAAGAAATGAACAAGGACAGAC  |     |     |     | ---  | GAATGTTAGAGGCTCAGGAATGAGAATAC  |      | ...-3' |
| KF881564 | 5'-. . . TGATCCCTGAAAGAAATGAACAAGGACAGAC  |     |     |     | ---  | GAATGTTAGAGGCTCAGGAATGAGAATAC  |      | ...-3' |
| KF881346 | 5'-. . . TGATCCCTGAAAGAAATGAACAAGGACAGAC  |     |     |     | ---  | GAATGTTAGAGGCTCAGGAATGAGAATAC  |      | ...-3' |
| KF881667 | 5'-. . . TGATCCCTGAAAGAAATGAACAAGGACAGAC  |     |     |     | ---  | GAATGTTAGAGGTT CAGGAATGAGAATAC |      | ...-3' |
| DQ997354 | 5'-. . . TGGTTCCTGAAAGGAATGAACAAGGGCAGAT  |     |     |     | ---  | GAATGTGAGAGGCTCAGGAATGAGAATAC  |      | ...-3' |
| KF881622 | 5'-. . . TGATCCCTGAAAGAAATGAACAAGGACAGAC  |     |     |     | ---  | GAATGTTAGAGGTT CAGGAATGAGAATAC |      | ...-3' |
| KF881324 | 5'-. . . TGATCCCTGAAAGAAATGAACAAGGACAGAC  |     |     |     | ---  | GAATGTTAGAGGCTCAGGAATGAGAATAC  |      | ...-3' |
| DQ997142 | 5'-. . . TGATTCCTGAAAGGAATGAACAAGGGCAGAC  |     |     |     | ---  | GAATGTGAGAGGCTCAGGAATGAGAATAC  |      | ...-3' |
| KF881317 | 5'-. . . TGATCCCTGAAAGAAATGAACAAGGACAGAC  |     |     |     | ---  | GAATGTTAGAGGCTCAGGAATGAGAATAC  |      | ...-3' |
| KF881701 | 5'-. . . TGATCCCTGAAAGAAATGAACAAGGACAGAC  |     |     |     | ---  | GAATGTTAGAGGCTCAGGAATGAGAATAC  |      | ...-3' |
| DQ997225 | 5'-. . . TGGTTCCTGAAAGGAATGAACAAGGGCAGAC  |     |     |     | ---  | GAATGTGAGAGGCTCAGGAATGAGAATAC  |      | ...-3' |
| AY950280 | 5'-. . . TGGTTCCTGAAAGGAATGAACAAGGGCAGAC  |     |     |     | ---  | GAATGTGAGAGGCTCAGGAATGAGAATAC  |      | ...-3' |
| GU727666 | 5'-. . . TGATTCCTGAAAGGAATGAACAAGGGCAGAC  |     |     |     | ---  | GAATGTGAGAGGCTCGGGAATGAGAATAC  |      | ...-3' |
| JX534546 | 5'-. . . TGGTTCCTGAGAGAAATGAACAAGGGCAAAC  |     |     |     | ---  | GAATGTGAGAGGCTCAGGAATGAGAATAC  |      | ...-3' |
| GU727674 | 5'-. . . TGATTCCTGAAAGGAATGAACAAGGGCAGAC  |     |     |     | ---  | GAATGTGAGAGGCTCGGGAATGAGAATAC  |      | ...-3' |
| DQ997149 | 5'-. . . TGATTCCTGAAAGGAATGAGCAAGGGCAGAC  |     |     |     | ---  | GAATGTGAGAGGATCAGGAATGAGAATAC  |      | ...-3' |
| FR687271 | 5'-. . . TGATTCCTGAAAGAAATGAACAAGGACAGAC  |     |     |     | ---  | GAATGTGAGGGGATCAGGAATGAGAATAC  |      | ...-3' |
| JX534562 | 5'-. . . TGATTCCTGAAAGAAATGAACAAGGCAGAC   |     |     |     | ---  | GAATGTGAGAGGCTCGGGAATGAGAATAC  |      | ...-3' |
| AF144300 | 5'-. . . TGATTCCTGAAAGGAATGAGCAAGGCAAAC   |     |     |     | ---  | GAATGTGAGAGGCTCAGGAATGAGAATAC  |      | ...-3' |
| EU263350 | 5'-. . . TGATTCCTGAAAGGAATGAGCAAGGGCAGAC  |     |     |     | ---  | GAATGTGAGAGGCTCAGGAATGAGAATAC  |      | ...-3' |
| EU263342 | 5'-. . . TGATTCCTGAAAGGAATGAACAAGGGCAAAC  |     |     |     | ---  | GAATGTGAGAGGCTCAGGAATGAGAATAC  |      | ...-3' |
| DQ366311 | 5'-. . . TGATCCCTGAAAGGAATGAGCAAGGTCAAAC  |     |     |     | ---  | GAATGTGAGGGGATCAGGAATGAGAATAC  |      | ...-3' |
| CY015088 | 5'-. . . TGATTCCTGAAAGAAATGAACAAGGGCAGGC  |     |     |     | ---  | GAATGTAAGAGGCTCAGGAATGAGAATAC  |      | ...-3' |
| DQ997101 | 5'-. . . TGATTCCTGAAAGGAATGAGCAAGGGCAGAC  |     |     |     | ---  | GAATGTGAGGGGCTCAGGGATGAGAATAC  |      | ...-3' |
| DQ997121 | 5'-. . . TGATTCCTGAAAGAAATGAACAAGGGCAGAC  |     |     |     | ---  | GAATGTAAGAGGTCAGGGATGAGAATAC   |      | ...-3' |
| EU871817 | 5'-. . . TGATTCCTGAAAGGAATGAACAAGGGCAAAC  |     |     |     | ---  | GAATGTAAGAGGATCAGGAATGAGGATAC  |      | ...-3' |
| FR687270 | 5'-. . . TGATTCCTGAAAGAAATGAACAAGGACAAAC  |     |     |     | ---  | GAATGTGAGAGGATCAGGATTGAGGATAC  |      | ...-3' |
| DQ366335 | 5'-. . . TGATCCCTGAACGGAATGAACAAGGGACAGAC |     |     |     | ---  | AAATGTGAGAGGTT CAGGAATGAGAATAC |      | ...-3' |
| DQ366327 | 5'-. . . TGATCCCTGAACGGAATGAACAAGGGACAGAC |     |     |     | ---  | AAATGTGAGAGGTT CAGGAATGAGAATAC |      | ...-3' |
| DQ997110 | 5'-. . . TGATCCCTGAAAGAAATGAACAAGGTCAAAC  |     |     |     | ---  | GAATGTGAGGGGCTCAGGAATGAGAATAC  |      | ...-3' |
| DQ997132 | 5'-. . . TGATCCCTGAAAGAAATGAGCAAGGTCAAAC  |     |     |     | ---  | GAATGTGAGGGGCTCAGGAATGAGAATAC  |      | ...-3' |
| DQ366303 | 5'-. . . TGATCCCTGAAAGGAATGAGCAAGGTCAAAC  |     |     |     | ---  | GAATGTGAGGGGATCAGGAATGAGAATAC  |      | ...-3' |
| DQ366319 | 5'-. . . TGATCCCTGAAAGGAATGAGCAAGGTCAAAC  |     |     |     | ---  | GAATGTGAGGGGATCAGGAATGAGAATAC  |      | ...-3' |
| DQ454106 | 5'-. . . TGATTCCTGAAAGGAATGAACAAGGGCAGAC  |     |     |     | ---  | GAATGTGAGAGGATCAGGAATGAGAATAC  |      | ...-3' |
| CY061882 | 5'-. . . TGATCCCTGAAAGAAATGAGCAAGGTCAGAC  |     |     |     | ---  | GAACGTAAGGGGTT CAGGAATGAGAATAC |      | ...-3' |
| CY015126 | 5'-. . . TGATCCCTGAAAGAAATGAGCAAGGTCAAAC  |     |     |     | ---  | GAACGTGAGGGGTT CAGGAATGAGAATAC |      | ...-3' |
| GU596981 | 5'-. . . TGGTCCCGGAAAGGAATGAGCAAGGTCAGAC  |     |     |     | ---  | GAACGTGAGGGGTT CAGGAATGAGAATAC |      | ...-3' |
| FJ031998 | 5'-. . . TGATTCCTGAAAGAAATGAACAAGGGCAAAC  |     |     |     | ---  | GAATGTAAGGGGATCAGGAATGAGAATAC  |      | ...-3' |
| CY014732 | 5'-. . . TGATTCCTGAGAGGAATGAACAAGGACAAAC  |     |     |     | ---  | GAATGTGAGAGGTT CAGGAATGAGGATAC |      | ...-3' |
| EF392844 | 5'-. . . TGATTCCTGAAAGAAATGAACAAGGGCAAAC  |     |     |     | ---  | GAATGTAAGGGGATCAGGAATGAGAATAC  |      | ...-3' |
| EF210572 | 5'-. . . TGATTCCTGAAAGAAATGAACAAGGGCAAAC  |     |     |     | ---  | GAATGTAAGGGGTT CAGGAATGAGAATAC |      | ...-3' |
| EU871943 | 5'-. . . TGATTCCTGAAAGGAATGAACAAGGACAGAC  |     |     |     | ---  | GAATGTGAGAGGCTCAGGAATGAGAATAC  |      | ...-3' |
| FJ868022 | 5'-. . . TGATTCCTGAAAGGAATGAAAAGGGCAGAC   |     |     |     | ---  | GAATGTGAGAGGATCAGGAATGAGAATAC  |      | ...-3' |
| EF112202 | 5'-. . . TGATTCCTGAAAGGAATGAACAAGGGCAGAC  |     |     |     | ---  | GAATGTGAGAGGCTCAGGAATGAGAATAC  |      | ...-3' |
| AY856861 | 5'-. . . TGATTCCTGAAAGGAATGAACAAGGGCAAAC  |     |     |     | ---  | GAATGTGAGAGGCTCAGGATTGAGAATAC  |      | ...-3' |
