# Supplementary material for: Evidence for a Novel Mechanism of Influenza Virus-Induced Type I Interferon Expression by a Defective RNA-Encoded Protein
Source: PubMed Central journal article supplement (PMC4449196; doi:10.1371/journal.ppat.1004924), 2015-05-29
Supplement: ppat.1004924.s003.pdf [file ppat.1004924.s003.pdf]

**S3 Table. Expressional changes of PB2<sub>Δ</sub> RNA in multiple undiluted passages of plaque purified viral clones.** MDCKII cells were infected with plaque-purified PB2<sub>Δ</sub>-free rKAN-1 WT or Vietnam clones for 16-24 h. Undiluted supernatants were transferred to untreated MDCKII cells for 5 passages. Total RNA was isolated from every passage and expressional changes of PB2<sub>Δ</sub> RNA were analyzed by qRT-PCR and are depicted as *n*-fold normalized to first passage.

| virus        | clone | passage number |        |        |        |       |
|--------------|-------|----------------|--------|--------|--------|-------|
|              |       | 1              | 2      | 3      | 4      | 5     |
| rKAN-1<br>WT | 1     | 1,000          | 1,409  | 0,722  | 0,084  | 0,036 |
|              | 2     | 1,000          | 10,666 | 2,049  | 0,106  | 0,166 |
|              | 3     | 1,000          | 5,736  | 2,151  | 0,401  | 0,034 |
|              | 4     | 1,000          | 5,502  | 12,510 | 0,300  | 0,516 |
|              | 5     | 1,000          | 3,283  | 5,560  | 0,169  | 0,007 |
|              | 6     | 1,000          | 4,184  | 1,454  | 0,094  | 0,406 |
|              | 7     | 1,000          | 12,338 | 5,011  | 0,325  | 0,082 |
|              | 8     | 1,000          | 67,415 | 49,522 | 32,900 | 1,602 |
|              | 9     | 1,000          | 1,333  | 5,598  | 0,690  | 0,223 |
|              | 10    | 1,000          | 0,771  | 0,024  | 0,001  | 0,000 |
|              | 11    | 1,000          | 5,796  | 2,049  | 0,294  | 0,012 |
|              | 12    | 1,000          | 13,595 | 2,809  | 1,214  | 0,149 |
| Vietnam      | 1     | 1,000          | 0,790  | 1,444  | 0,488  | 0,737 |
|              | 2     | 1,000          | 1,419  | 0,176  | 0,008  | 0,001 |
|              | 3     | 1,000          | 3,618  | 1,490  | 0,040  | 0,104 |
|              | 4     | 1,000          | 0,283  | 0,042  | 0,003  | 0,001 |
|              | 5     | 1,000          | 1,165  | 0,798  | 0,040  | 0,047 |
|              | 6     | 1,000          | 1,510  | 0,455  | 0,049  | 0,087 |
|              | 7     | 1,000          | 2,558  | 3,238  | 0,613  | 2,676 |
|              | 8     | 1,000          | 0,871  | 0,249  | 0,059  | 0,003 |
|              | 9     | 1,000          | 0,529  | 0,557  | 0,041  | 0,005 |
|              | 10    | 1,000          | 0,333  | 0,083  | 0,005  | 0,001 |
|              | 11    | 1,000          | 0,470  | 0,085  | 0,003  | 0,001 |
|              | 12    | 1,000          | 1,693  | 0,238  | 0,020  | 0,010 |
