# Supplementary material for: Evidence for a Novel Mechanism of Influenza Virus-Induced Type I Interferon Expression by a Defective RNA-Encoded Protein
Source: PubMed Central journal article supplement (PMC4449196; doi:10.1371/journal.ppat.1004924), 2015-05-29
Supplement: ppat.1004924.s004.pdf [file ppat.1004924.s004.pdf]

#### S4 Table. List of primers used in the study.

Primers:

| Gene                             | Forward 5'-3'                                    | Reverse 5'-3'                                             |
|----------------------------------|--------------------------------------------------|-----------------------------------------------------------|
| PB2 $\Delta$ _BsaI               | GCATGGTCTCGGGGAGCGAAAGCAGGTCA<br>AATATATTCAATATG | GCACGGTCTCGTATTAGTAGAAACAAGGTC<br>GTTTTTAAATAATTTCGACACTA |
| Myc_PB2_<br>EcoRV/XhoI           | CAGTGCAGGATATCATGGAGAGAATAAAA<br>GAATTACG        | GCGACTCGAGTCAAACCTTCTGACTCAATTG<br>TTCTCG                 |
| Myc_PB2 $\Delta$ _<br>EcoRV/XhoI | CAGTGCAGGATATCATGGAGAGAATAAAA<br>GAATTACG        | GCGACTCGAGTTATAGTTGAACACAGGGG<br>AATTG                    |

Primers used for strand-specific reverse transcription:

| Gene               | Forward 5'-3'                                   | Reverse 5'-3'                                     |
|--------------------|-------------------------------------------------|---------------------------------------------------|
| PB2 $\Delta$ _vRNA | GGCCGTCATGGTGGCGAATGAGAT<br>GATTCCTGAAAGGAATAGG |                                                   |
| PB2 $\Delta$ _cRNA |                                                 | GCTAGCTTCAGCTAGGCATCAGTAGAA<br>ACAAGGTCGTTTTTAAAT |
| PB2 $\Delta$ _mRNA |                                                 | CCAGATCGTTCGAGTCGTTTTTTTTTTT<br>TTTTTAAATAAATTCGA |

Primers used for quantitative real-time RT-PCR:

| Gene                      | Forward 5'-3'             | Reverse 5'-3'               |
|---------------------------|---------------------------|-----------------------------|
| <i>human:</i>             |                           |                             |
| GAPDH                     | GCAAATTCCATGGCACCGT       | GCCCCACTTGATTTTGGAGG        |
| IFN $\beta$               | TCTGGCACAACAGGTAGTAGGC    | GAGAAGCACAACAGGAG           |
| IP10                      | GGAACCTCCAGTCTCAGCACCA    | AGACATCTCTTCTCACCCCTC       |
| IL-6                      | TGAGATCTACTCGGCAAACCTAGTG | CTTCGTAGAGAACATAAGTCAGATACC |
| <i>murine:</i>            |                           |                             |
| GAPDH                     | GTCCACCAGCCTGTTGCTGTAG    | CCCCTCTTCCACCTTCGATG        |
| IFN $\beta$               | CGCCTGGATGGTGGTC          | AGTCCGCCTCTGATGCTTA         |
| IRF7                      | GAGACTGGCTATTGGGGGAG      | GACCGAAATGCTTCCAGGG         |
| Mx1                       | GATCCGACTTCACTTCCAGATGG   | CATCTCAGTGGTAGTCAACCC       |
| OAS-1                     | GTCAATGTCGTGTGTGATTTCT    | CTCCCCGTCGGTTAACTGA         |
| <i>canine:</i>            |                           |                             |
| GAPDH                     | GCCAACATCAAATGGGGTGATGC   | AGAGATGATGACCCTCTTGG        |
| <i>influenza A virus:</i> |                           |                             |
| M1                        | AGATGAGTCTTCTAACCGAGGTCG  | TGCAAAAACATCTTCAAGTCTCTG    |
| PB2                       | ACCGGAGCAGAGCAGAATG       | CTGTTAATGCACCTGCGTCCT       |
| PB2 $\Delta$              | GGACCATATGGCCATAATCAAG    | GAGTATTCTCATTCTATTCTTTTCAG  |
| PB2 $\Delta$ _vRNA        | GGCCGTCATGGTGGCGAAT       | GTCCTTTCCAAGAACGGTAAG       |
| PB2 $\Delta$ _cRNA        | GATGATTCTGAAAGGAATAGG     | GCTAGCTTCAGCTAGGCATC        |
| PB2 $\Delta$ _mRNA        | GATGATTCTGAAAGGAATAGG     | CCAGATCGTTCGAGTCGT          |
