# Supplementary material for: Evidence for a Novel Mechanism of Influenza Virus-Induced Type I Interferon Expression by a Defective RNA-Encoded Protein
Source: PubMed Central journal article supplement (PMC4449196; doi:10.1371/journal.ppat.1004924), 2015-05-29
Supplement: ppat.1004924.s005.pdf [file ppat.1004924.s005.pdf]

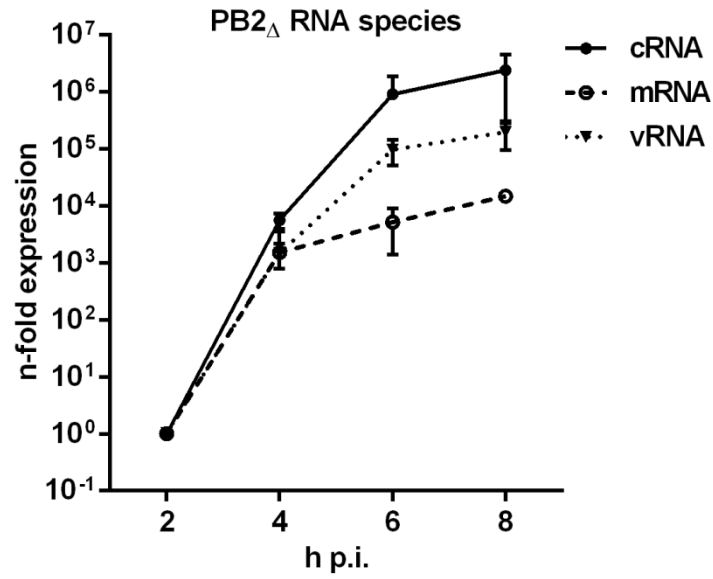

**S1 Fig. Expressional changes of PB2 $\Delta$  RNA species.** A549 cells were infected with 5 MOI KAN-1 and total RNA was isolated at the time points indicated. Expressional changes of the different PB2 $\Delta$  RNA species were detected by qRT-PCR and are depicted as mean *n*-fold ( $\pm$ SD) of three independent experiments normalized to the respective RNA expression 2 h p.i..
