# Supplementary material for: Evidence for a Novel Mechanism of Influenza Virus-Induced Type I Interferon Expression by a Defective RNA-Encoded Protein
Source: PubMed Central journal article supplement (PMC4449196; doi:10.1371/journal.ppat.1004924), 2015-05-29
Supplement: ppat.1004924.s006.pdf [file ppat.1004924.s006.pdf]

Source: 20121207\_CO\_0375ViVi\_Exp1\_Mix2\_R01R04R05\_GeLC\_24  
 Scannumber: 19010  
 Protein: PB2delta  
 Peptide Score: 100.15  
 Method: ITMS; CID; 3

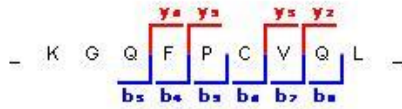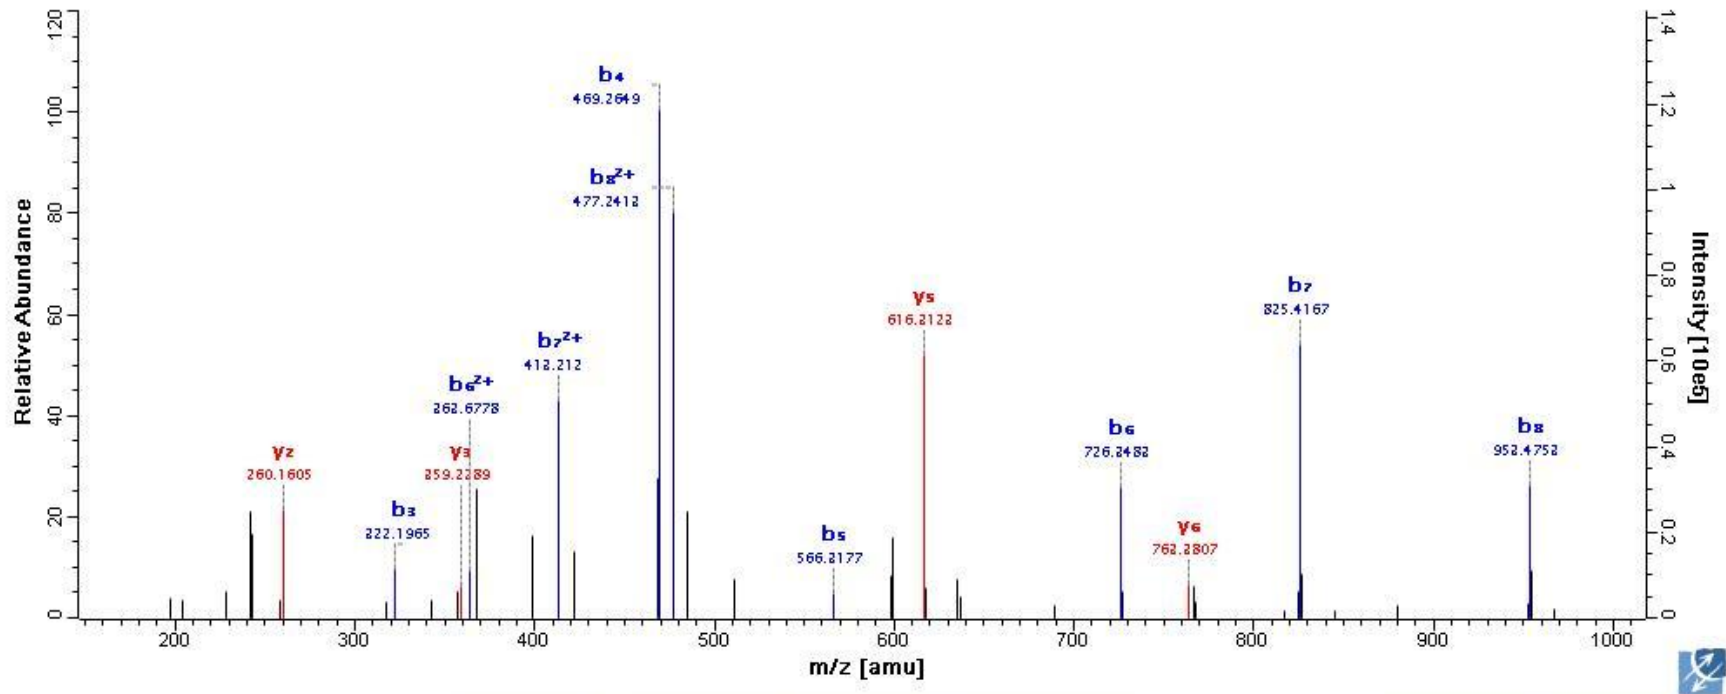

**S2 Fig. MS/MS spectrum of the tryptic C-terminal unique peptide KGQFPCVQL of the H5N1 KAN-1 virus protein PB2<sub>Δ</sub>.** 100 μg of protein mixtures from KAN-1-infected A549 cells were separated on a one-dimensional gel followed by in-gel digest by trypsin. LC-MS/MS analyses were performed on an EasyLC nano-HPLC (Proxeon Biosystems) coupled to an LTQ Orbitrap Elite mass spectrometer (Thermo Scientific). The MS data were processed using default parameters of the MaxQuant software (v1.2.2.9).
