# Supplementary material for: Evidence for a Novel Mechanism of Influenza Virus-Induced Type I Interferon Expression by a Defective RNA-Encoded Protein
Source: PubMed Central journal article supplement (PMC4449196; doi:10.1371/journal.ppat.1004924), 2015-05-29
Supplement: ppat.1004924.s007.pdf [file ppat.1004924.s007.pdf]

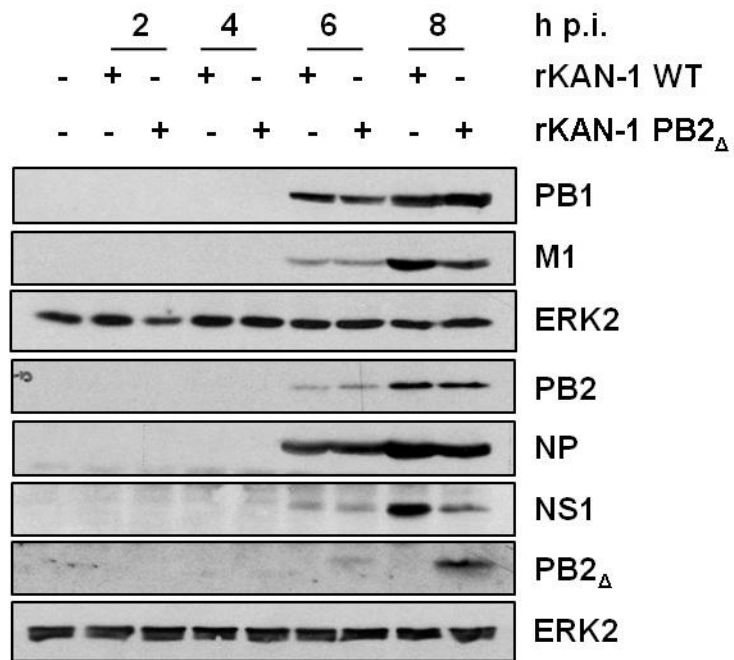

**S3 Fig. Expressional changes of viral proteins in presence of PB2<sub>Δ</sub> protein.** A549 cells were infected with 5 MOI of rKAN-1 WT or PB2<sub>Δ</sub> for 2, 4, 6 or 8 h. Expression of viral proteins PB1, PB2, NP, M1 and NS1 was analyzed by Western blot. Presence of PB2<sub>Δ</sub> was verified by using PB2-specific antibodies. ERK2 expression served as loading control. Blots are representative of three independent experiments.
