# Supplementary material for: Evidence for a Novel Mechanism of Influenza Virus-Induced Type I Interferon Expression by a Defective RNA-Encoded Protein
Source: PubMed Central journal article supplement (PMC4449196; doi:10.1371/journal.ppat.1004924), 2015-05-29
Supplement: ppat.1004924.s008.pdf [file ppat.1004924.s008.pdf]

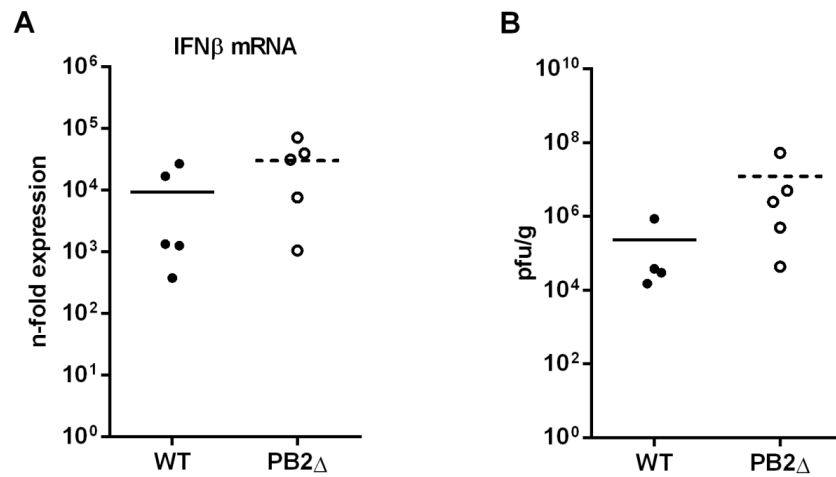

**S4 Fig. Effects of PB2 $\Delta$  protein *in vivo*.** BALB/c mice were infected with 50 pfu rKAN-1 wild type or PB2 $\Delta$ -expressing virus. **A)** Expression changes of IFN $\beta$  mRNA in lungs were analyzed two days p.i. by qRT-PCR. N-fold expression in individual animals normalized to uninfected PBS control mice is depicted. **B)** Viral lung titers were analyzed two days p.i. by standard plaque assay and are depicted for individual animals. **A, B)** Statistical significance was analyzed by Mann-Whitney test.
